# Supplementary material for: An I2-mediated cascade reaction of 2′-bromoacetophenones with benzohydrazides/benzamides leading to quinazolino[3,2-b]cinnoline or tryptanthrin derivatives
Source: Royal Society of Chemistry journal article supplement (doi:10.1039/c6ob02699k), 2017-01-01

## Supporting Information for

**I<sub>2</sub>-mediated cascade reaction of 2'-bromoacetophenones with  
benzohydrazides/benzamides leading to quinazolino[3,2-*b*]cinnoline or tryptanthrin  
derivatives**

*Shenghai Guo,\* Jianhui Zhai, and Xuesen Fan\**

*Collaborative Innovation Center of Henan Province for Green Manufacturing of Fine  
Chemicals, Key Laboratory of Green Chemical Media and Reactions, Ministry of Education,  
School of Chemistry and Chemical Engineering, Henan Normal University, Xinxiang, Henan  
453007, P. R. China. E-mail: [shguo@htu.cn](mailto:shguo@htu.cn); [xuesen.fan@htu.cn](mailto:xuesen.fan@htu.cn)*

### Table of Content

|                                                                                              |               |
|----------------------------------------------------------------------------------------------|---------------|
| <b>I. Table S1. Screening the Reaction Conditions for the Synthesis of 5a</b>                | <b>S2</b>     |
| <b>II. X-ray crystal structure and data of 3a</b>                                            | <b>S3</b>     |
| <b>III. <sup>1</sup>H and <sup>13</sup>C NMR Spectra of Compounds 3a-3u, 5a-5k, 6, and 7</b> | <b>S4-S36</b> |

**I. Table S1. Screening the Reaction Conditions for the Synthesis of 5a<sup>a</sup>**

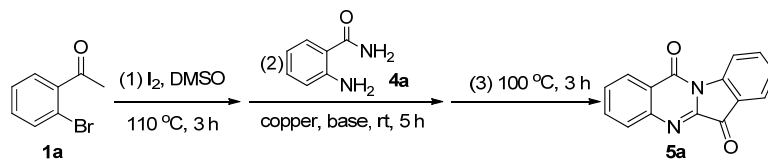

| entry | I <sub>2</sub> (equiv.) | 1a (equiv.) | catalyst (equiv.) | base (equiv.)                         | yield (%) <sup>b</sup> |
|-------|-------------------------|-------------|-------------------|---------------------------------------|------------------------|
| 1     | 1.5                     | 1.5         | –                 | K <sub>2</sub> CO <sub>3</sub> (4.0)  | nd                     |
| 2     | 1.5                     | 1.5         | CuI (0.2)         | K <sub>2</sub> CO <sub>3</sub> (4.0)  | 60                     |
| 3     | 1.5                     | 1.5         | CuCl (0.2)        | K <sub>2</sub> CO <sub>3</sub> (4.0)  | 63                     |
| 4     | 1.5                     | 1.5         | CuBr (0.2)        | K <sub>2</sub> CO <sub>3</sub> (4.0)  | 71                     |
| 5     | 1.5                     | 1.5         | CuBr (0.2)        | K <sub>3</sub> PO <sub>4</sub> (4.0)  | 64                     |
| 6     | 1.5                     | 1.5         | CuBr (0.2)        | Cs <sub>2</sub> CO <sub>3</sub> (4.0) | 44                     |
| 7     | 1.5                     | 1.5         | CuBr (0.1)        | K <sub>2</sub> CO <sub>3</sub> (4.0)  | 51                     |
| 8     | 1.5                     | 1.5         | CuBr (0.2)        | K <sub>2</sub> CO <sub>3</sub> (3.0)  | 59                     |
| 9     | 1.0                     | 1.0         | CuBr (0.2)        | K <sub>2</sub> CO <sub>3</sub> (4.0)  | 50                     |

<sup>a</sup>The reactions were run with (1) 1a, I<sub>2</sub>, DMSO, 110 °C, 3 h; (2) 4a (0.4 mmol), catalyst, base, rt (5 h)~100 °C (3 h). <sup>b</sup>Isolated yield; nd = not detected.

## II. X-ray crystal structure and data of 3a

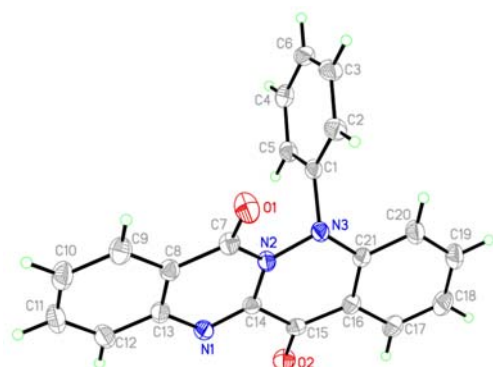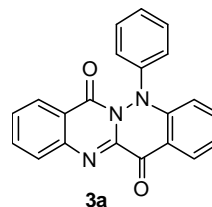

Bond precision: C-C = 0.0043 Å

Wavelength=0.71073

Cell: a=7.617 (12)

b=10.617 (17)

c=11.452 (18)

alpha=64.336 (15)

beta=72.042 (17)

gamma=88.506 (18)

Temperature: 295 K

|                        | Calculated    | Reported      |
|------------------------|---------------|---------------|
| Volume                 | 788 (2)       | 788 (2)       |
| Space group            | P -1          | P -1          |
| Hall group             | -P 1          | -P 1          |
| Moiety formula         | C21 H13 N3 O2 | C21 H13 N3 O2 |
| Sum formula            | C21 H13 N3 O2 | C21 H13 N3 O2 |
| Mr                     | 339.34        | 339.34        |
| Dx, g cm <sup>-3</sup> | 1.430         | 1.430         |
| Z                      | 2             | 2             |
| Mu (mm <sup>-1</sup> ) | 0.095         | 0.095         |
| F000                   | 352.0         | 352.0         |
| F000'                  | 352.15        |               |
| h,k,lmax               | 9,13,14       | 9,13,14       |
| Nref                   | 3587          | 3533          |
| Tmin,Tmax              | 0.982,0.984   | 0.982,0.984   |
| Tmin'                  | 0.982         |               |

Correction method= # Reported T Limits: Tmin=0.982 Tmax=0.984

AbsCorr = MULTI-SCAN

Data completeness= 0.985

Theta(max)= 27.420

R(reflections)= 0.0682 ( 2807)

wR2(reflections)= 0.1672 ( 3309)

S = 1.053

Npar= 235

### III. $^1\text{H}$ and $^{13}\text{C}$ NMR Spectra of Compounds 3a-3u, 5a-5k, 6, and 7

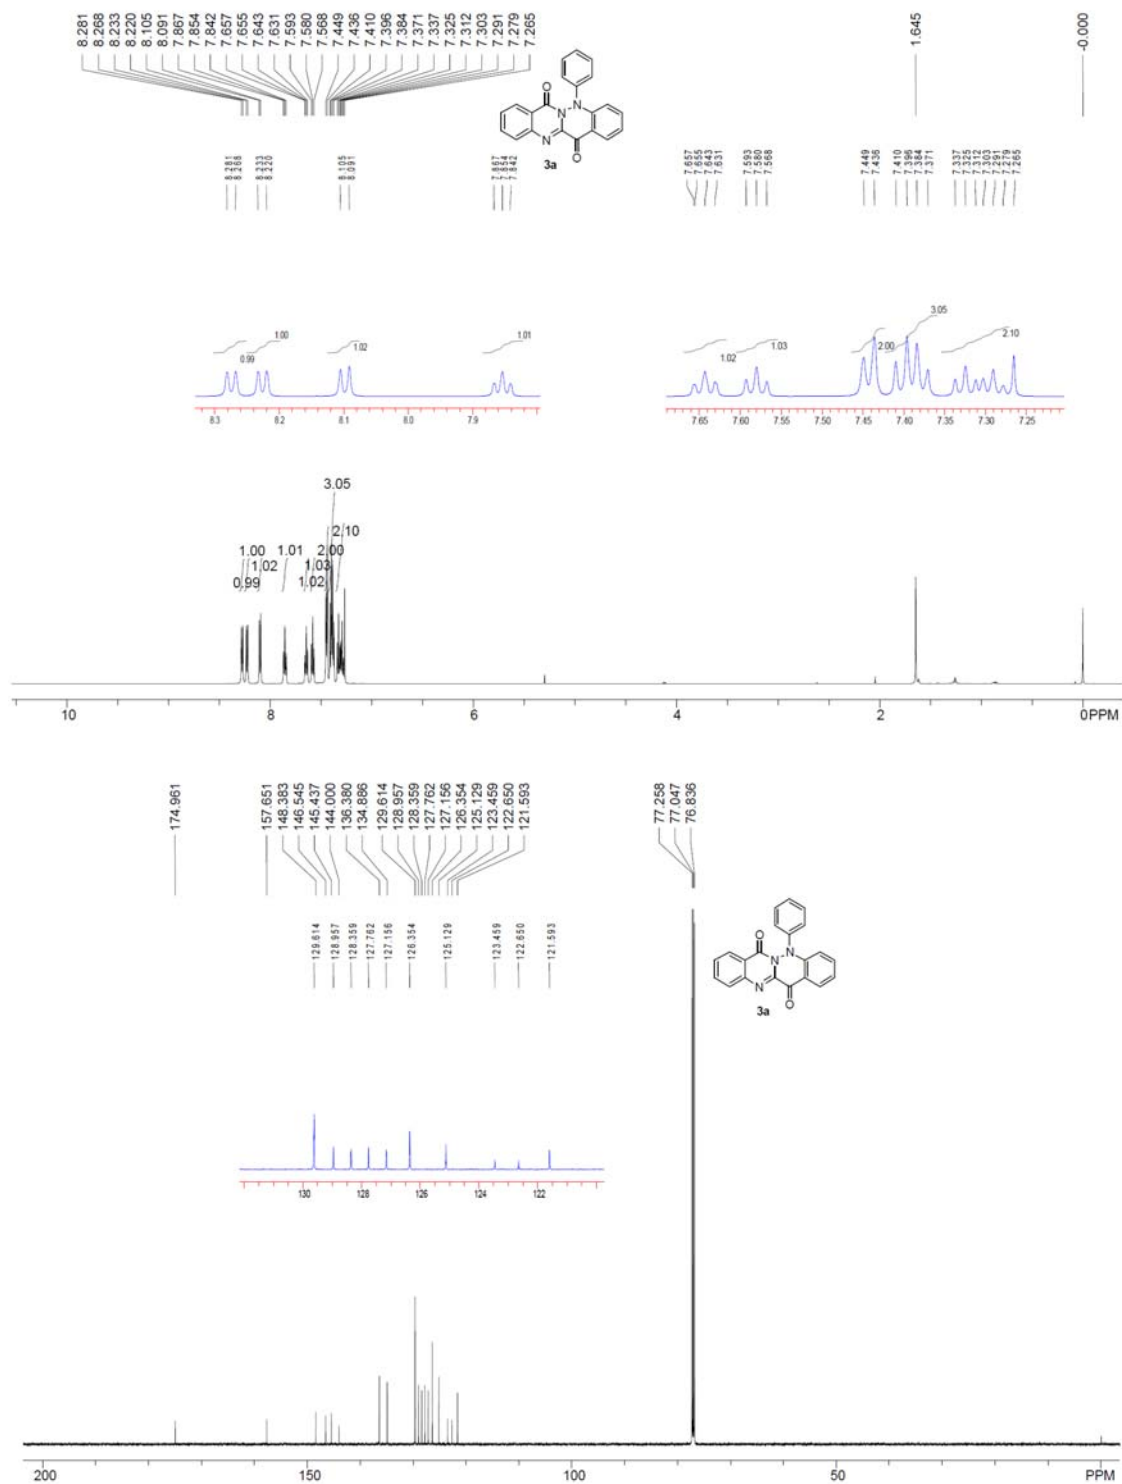

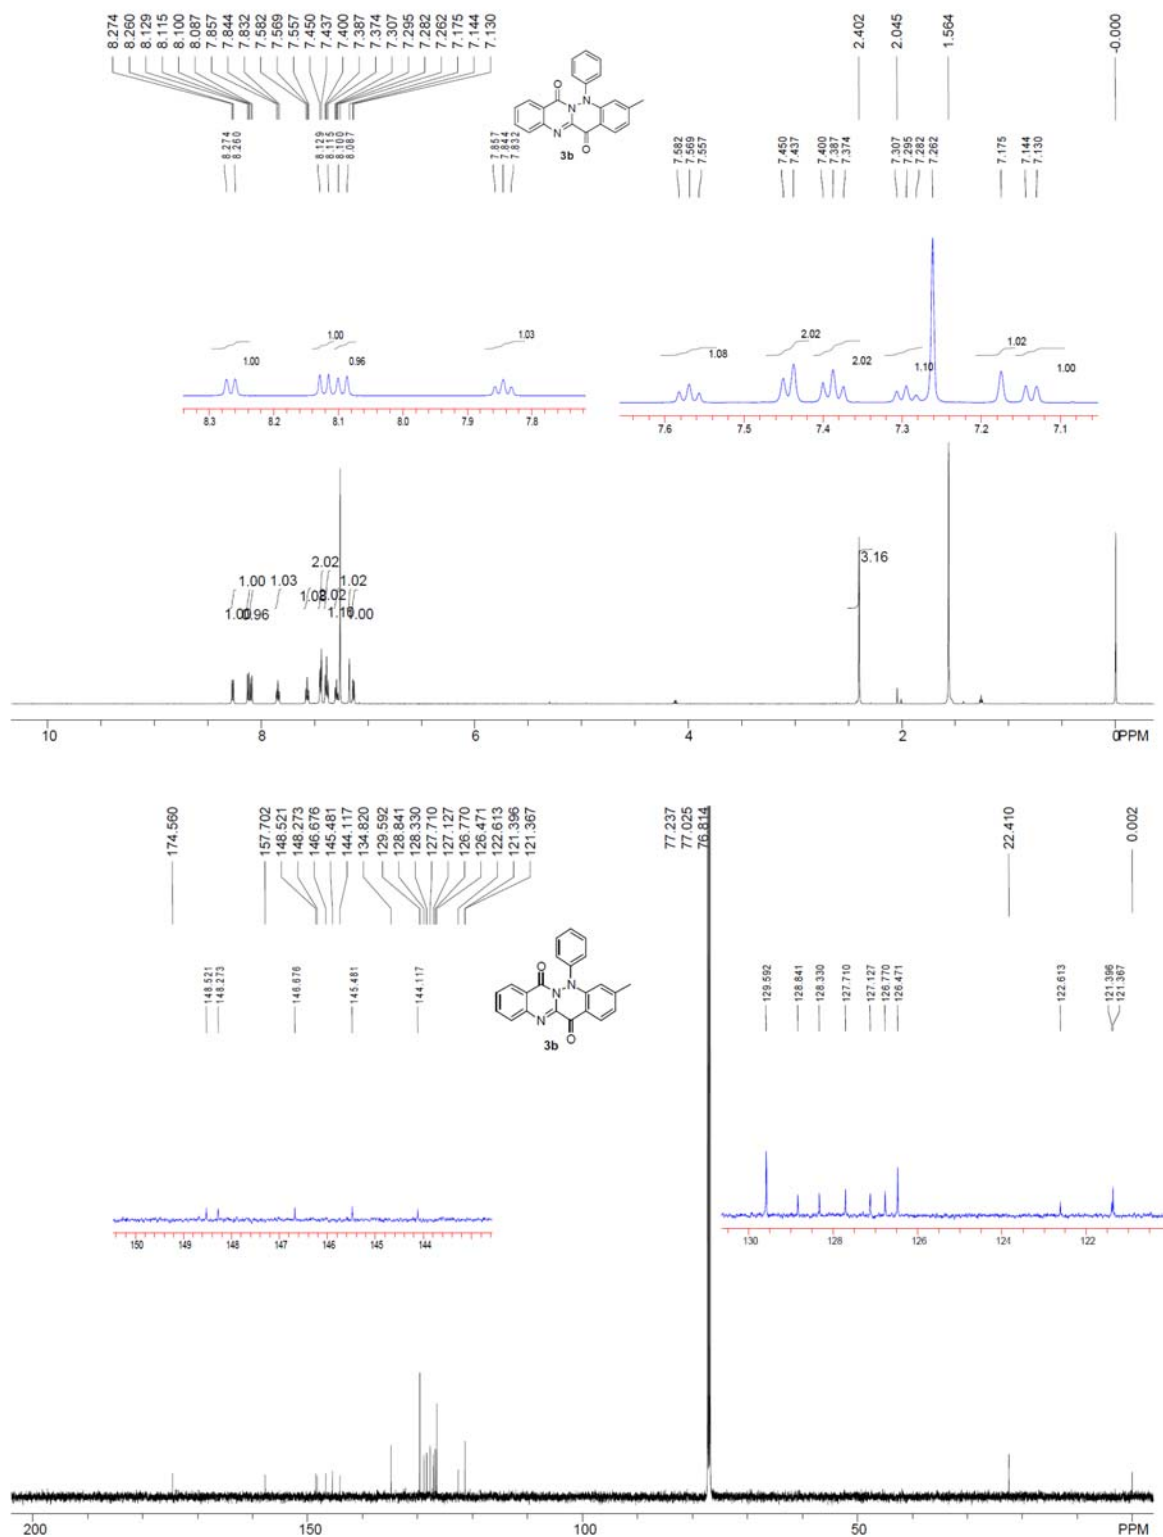

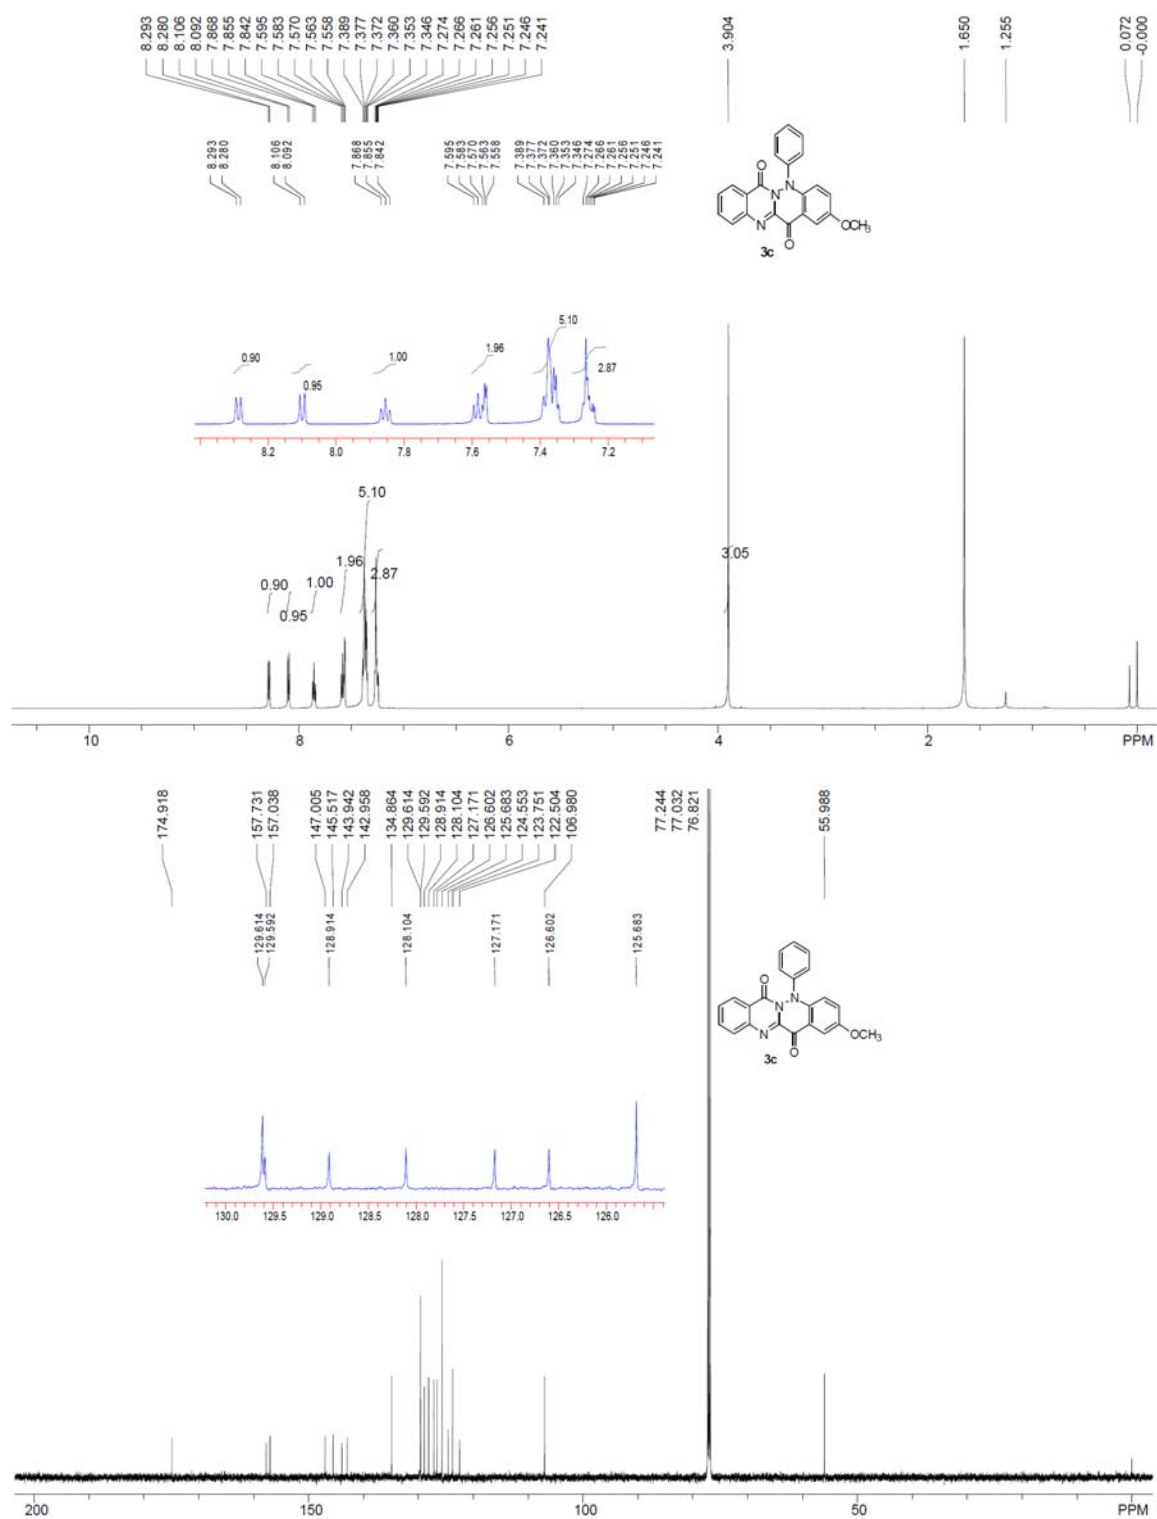

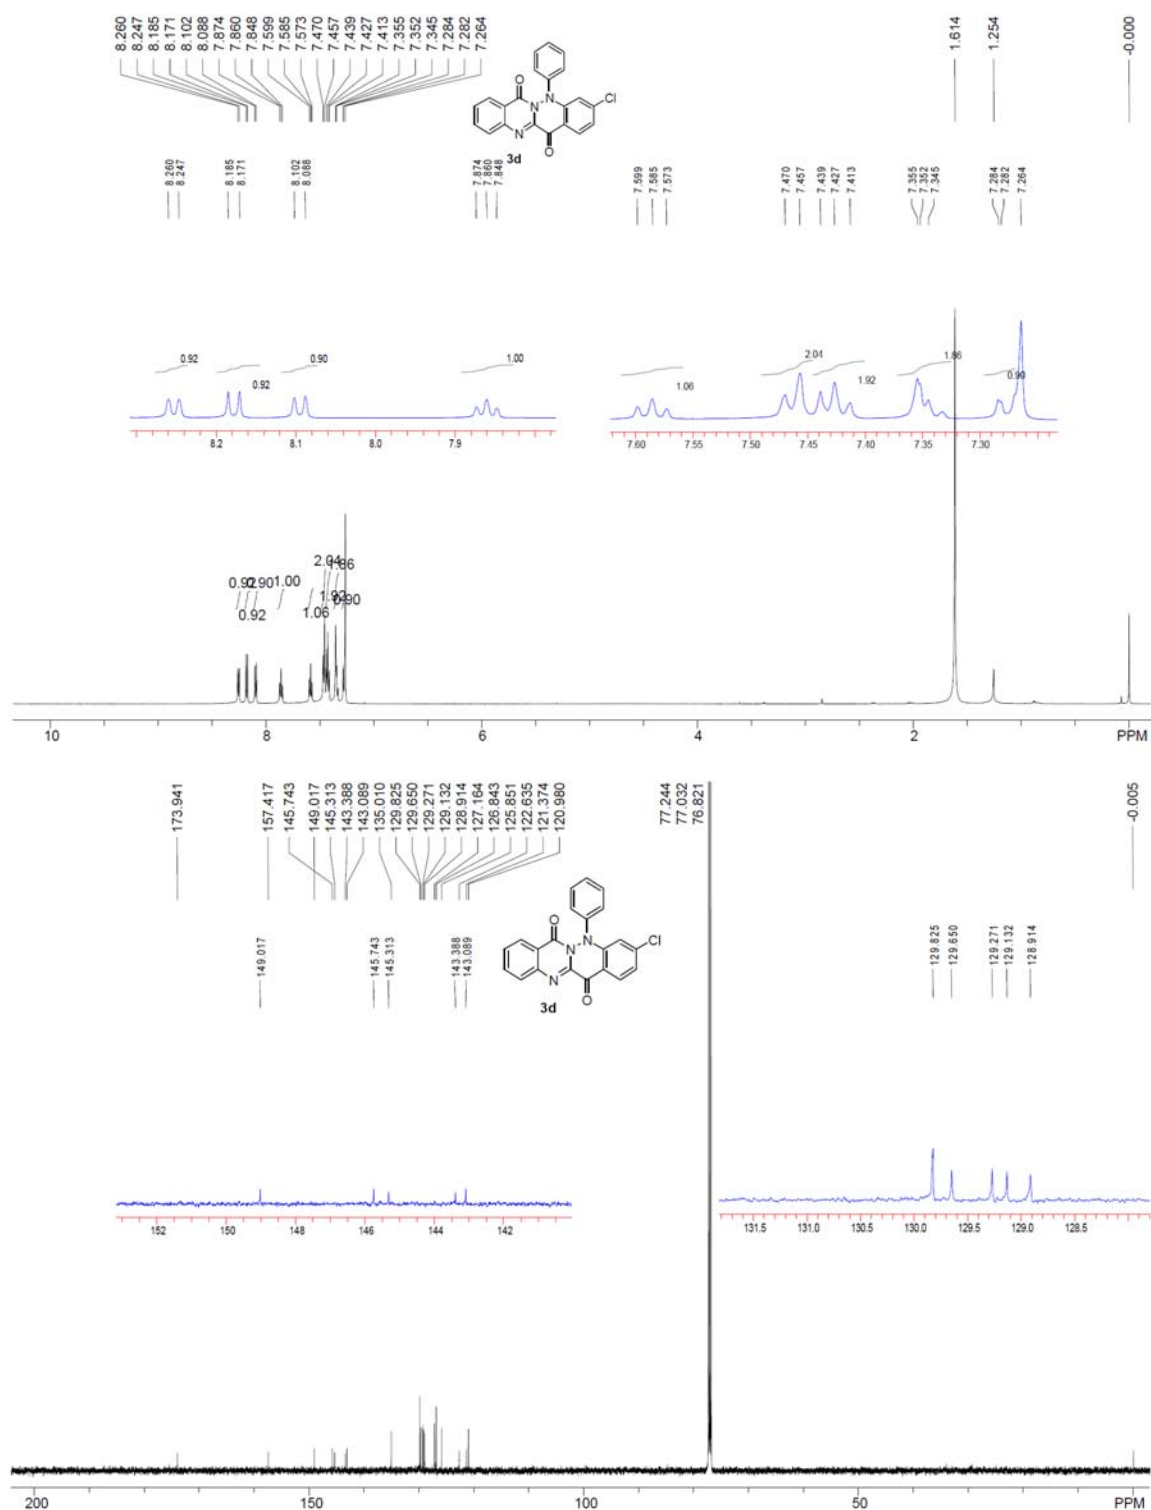

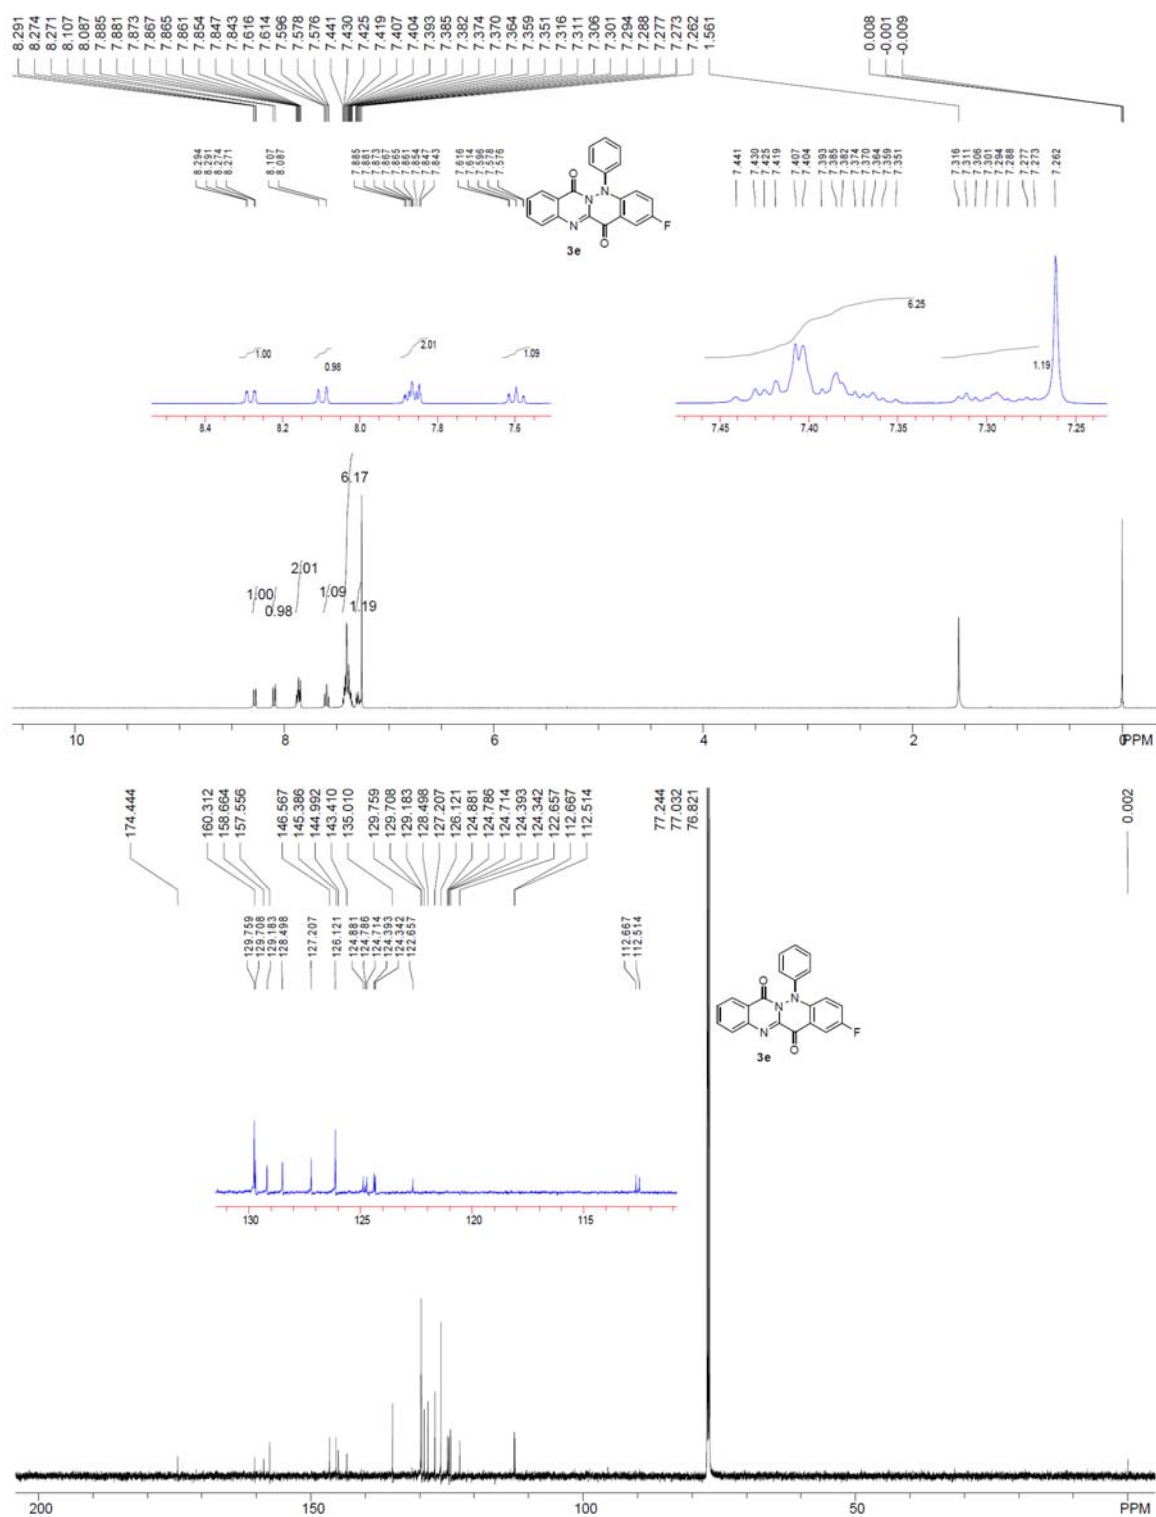



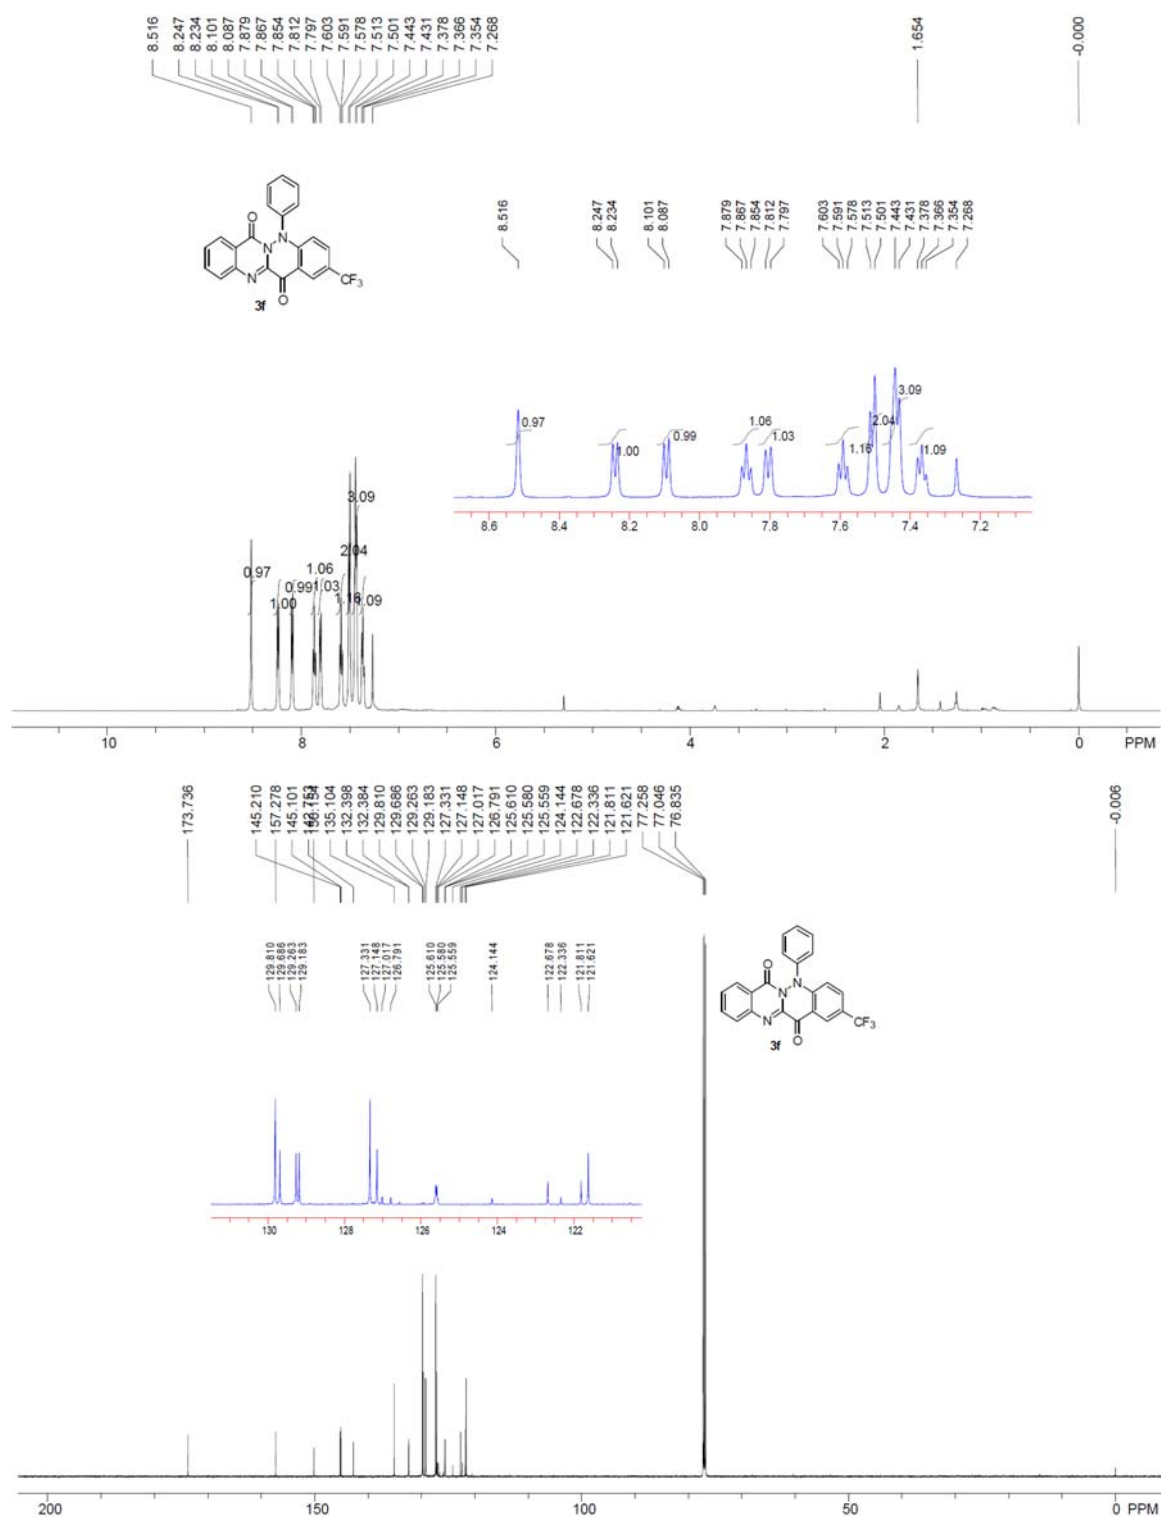

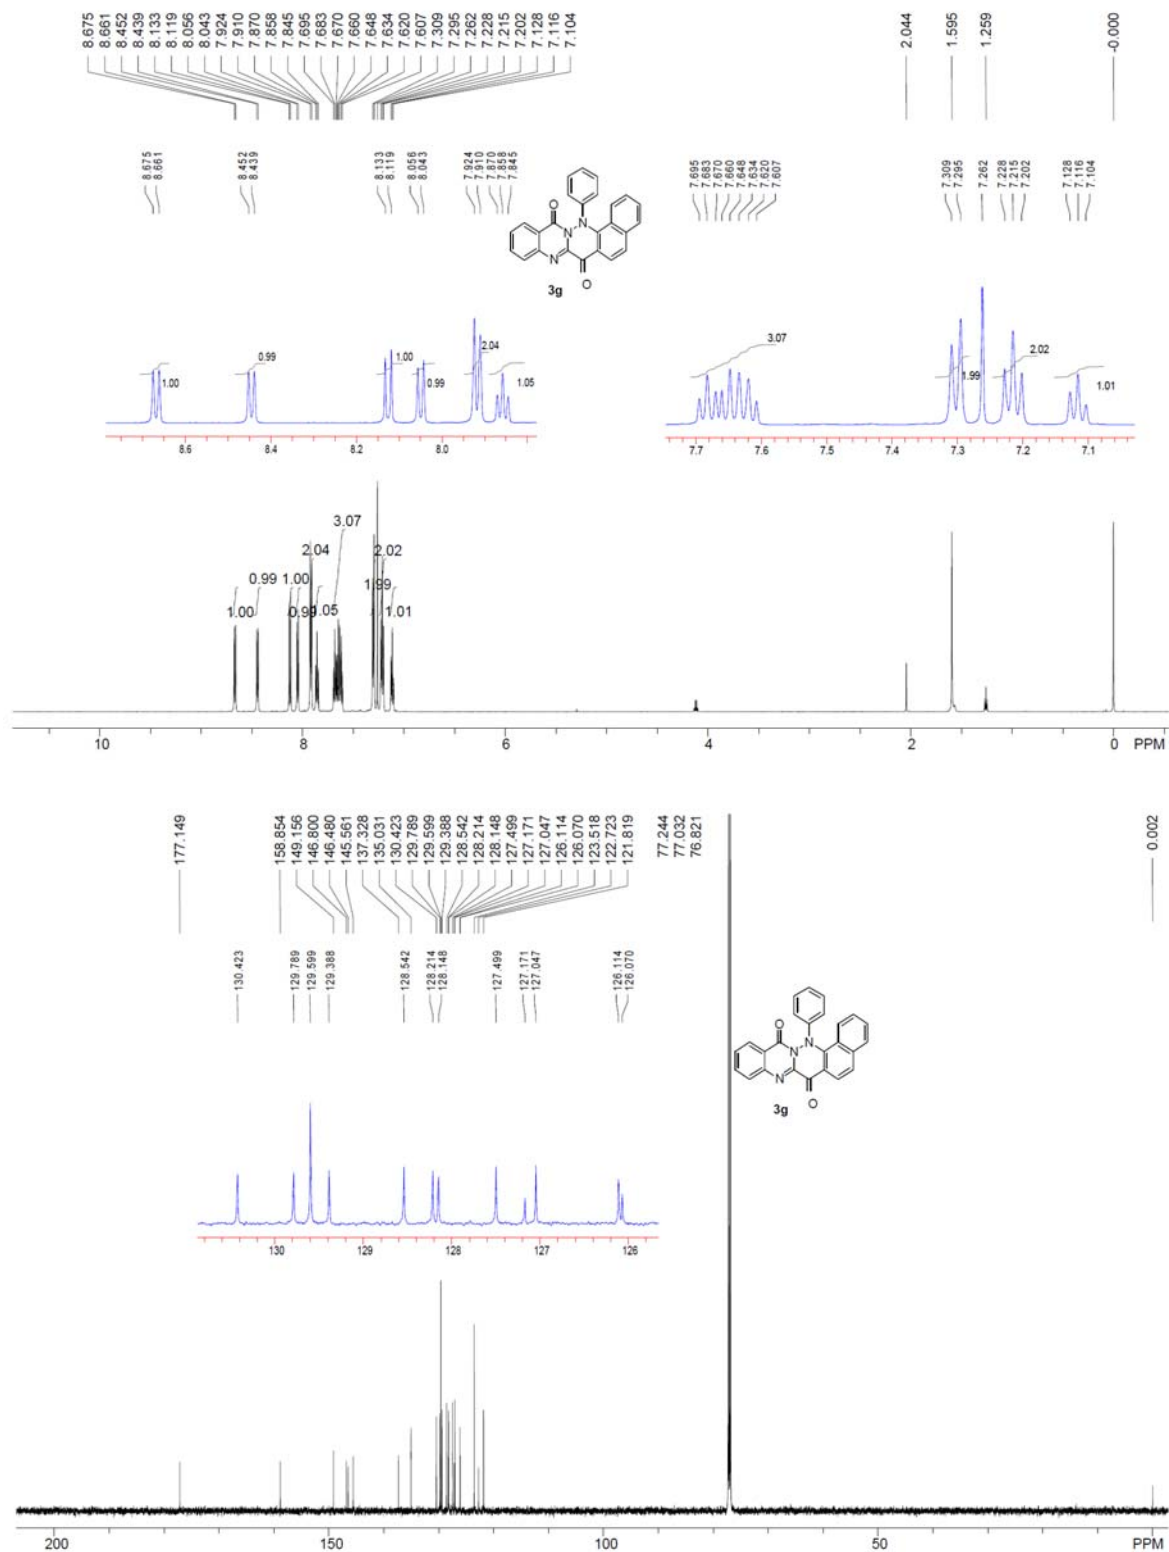

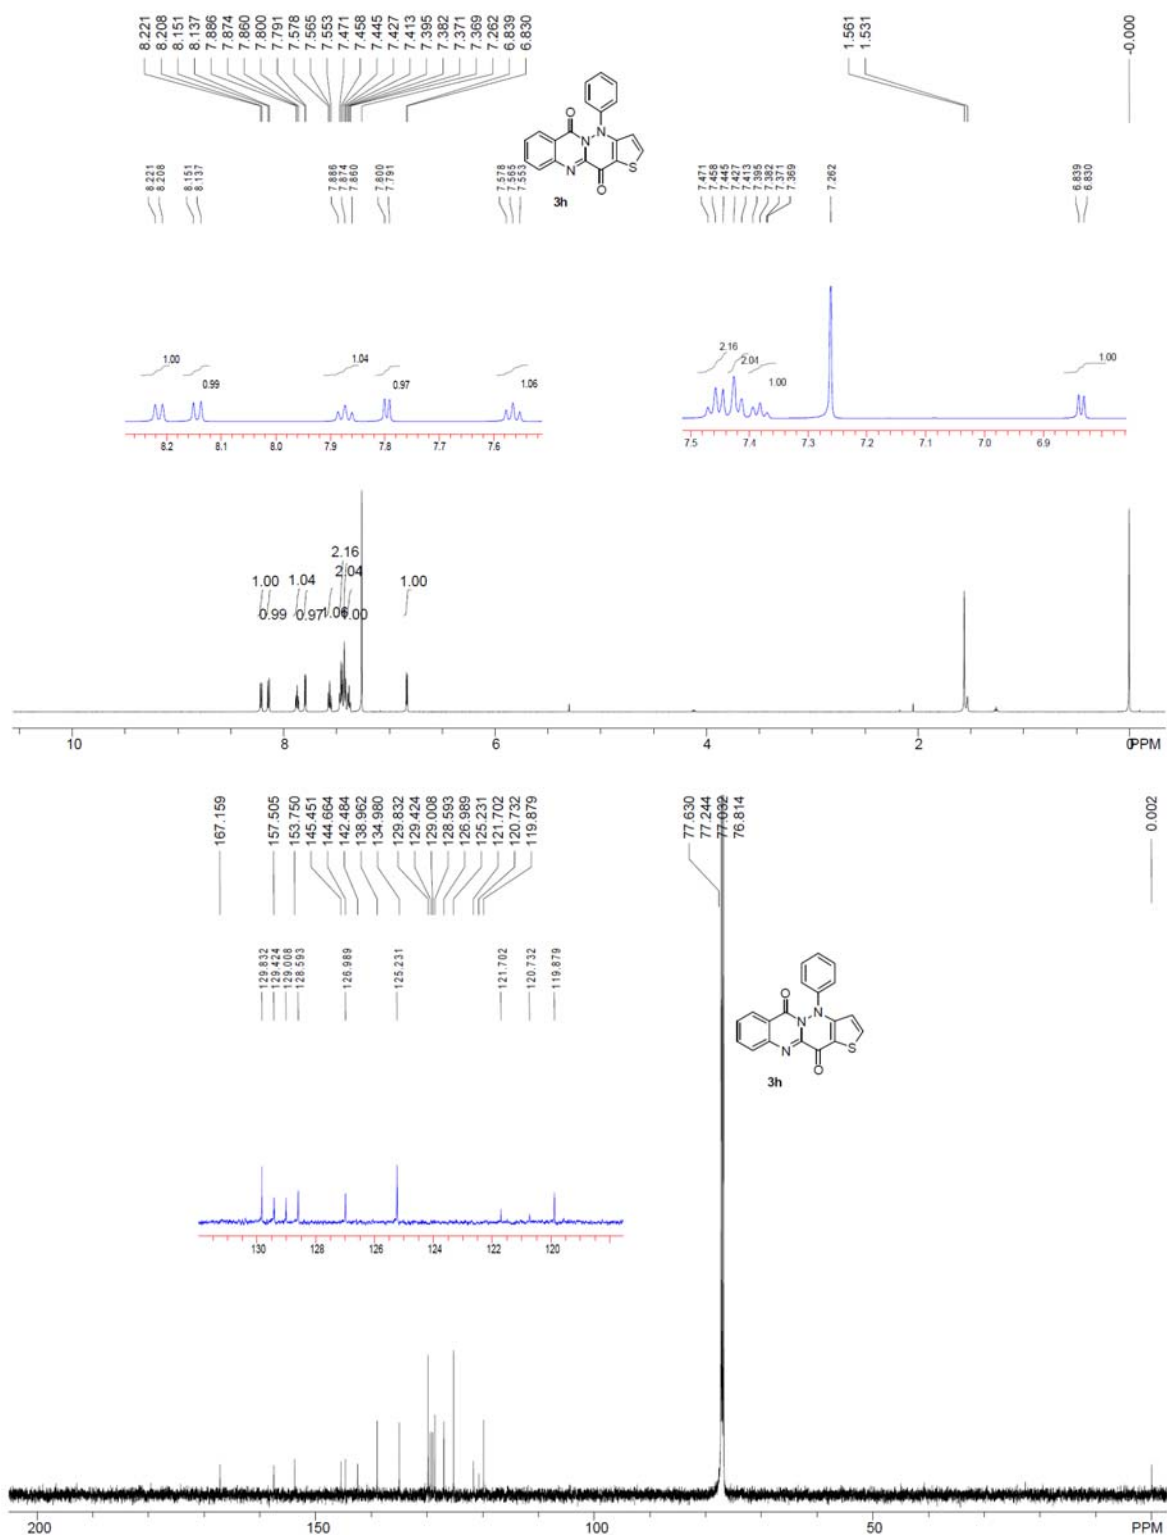

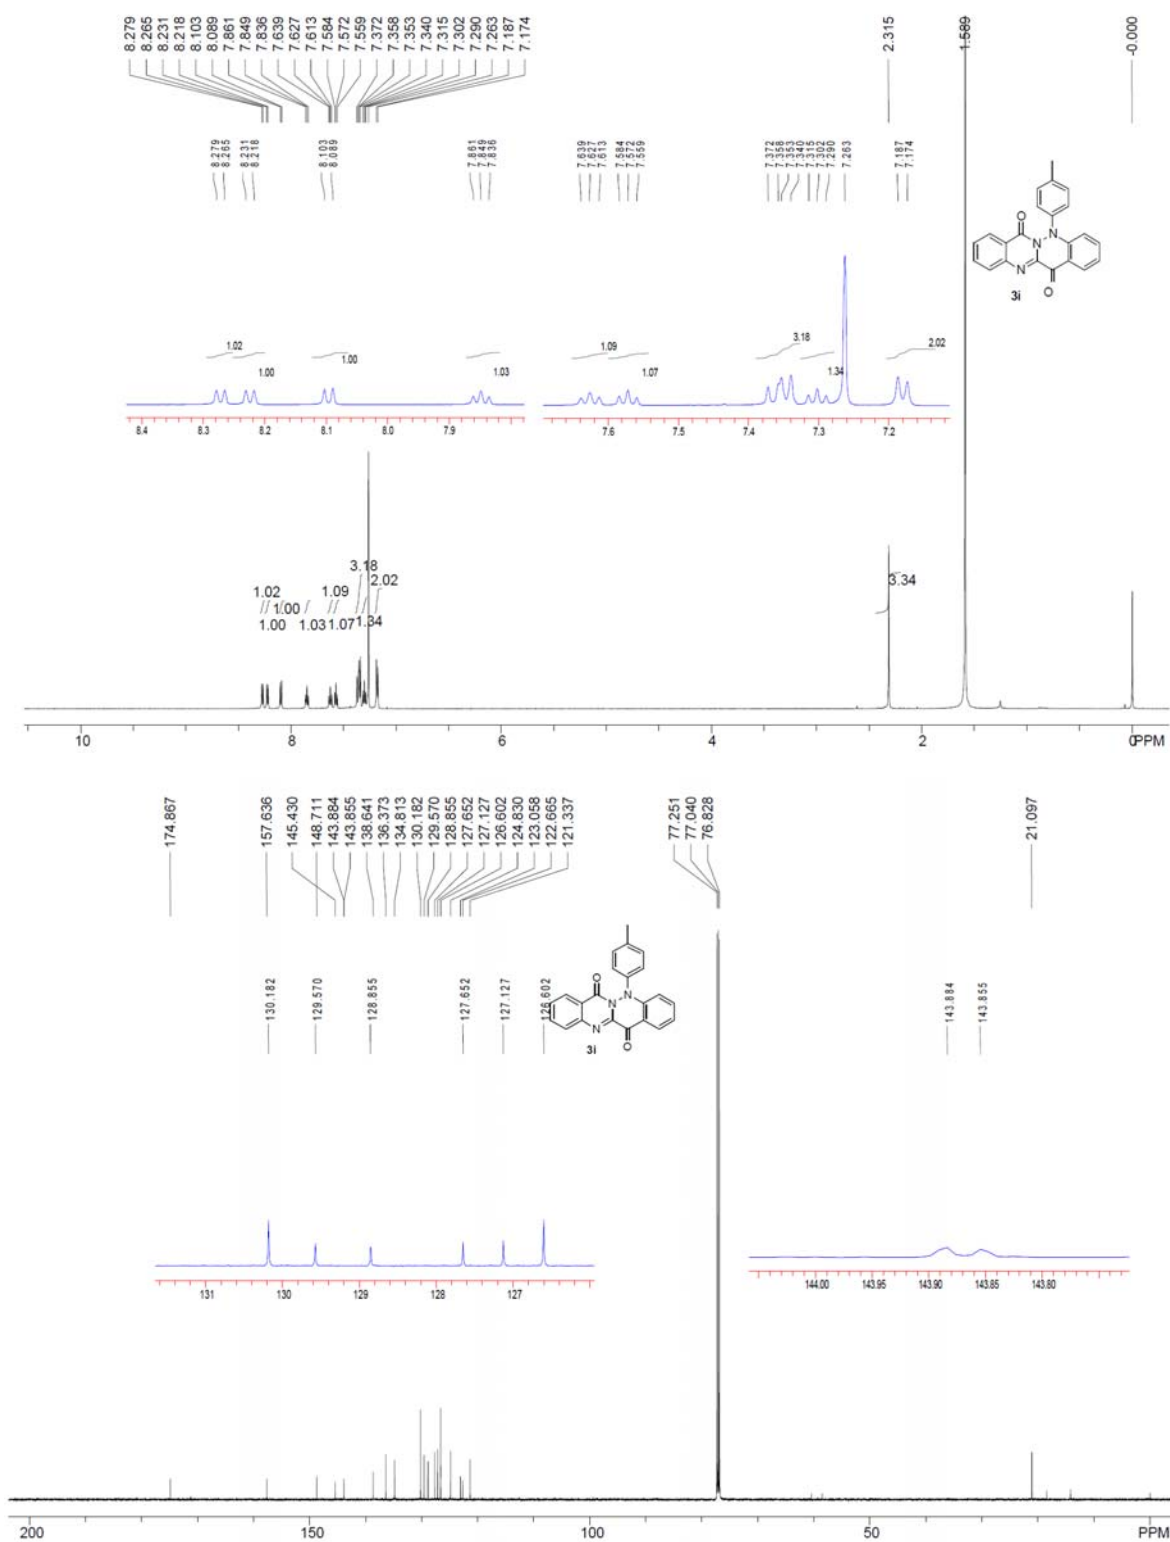

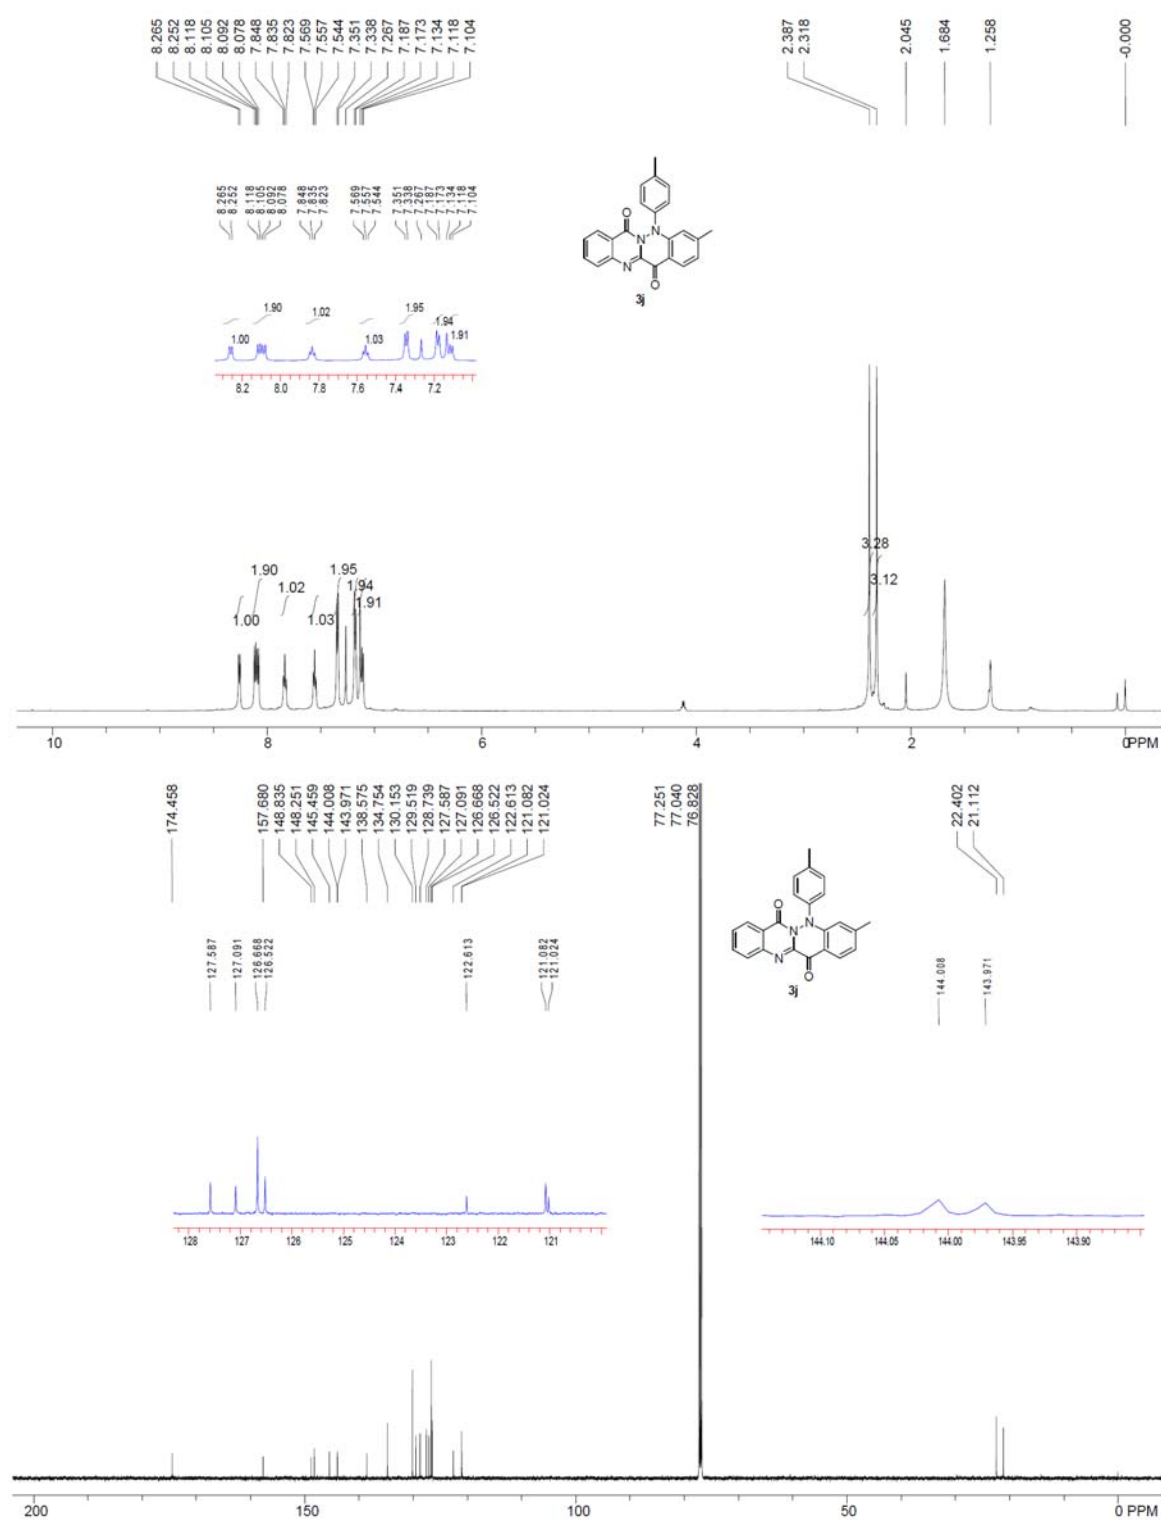

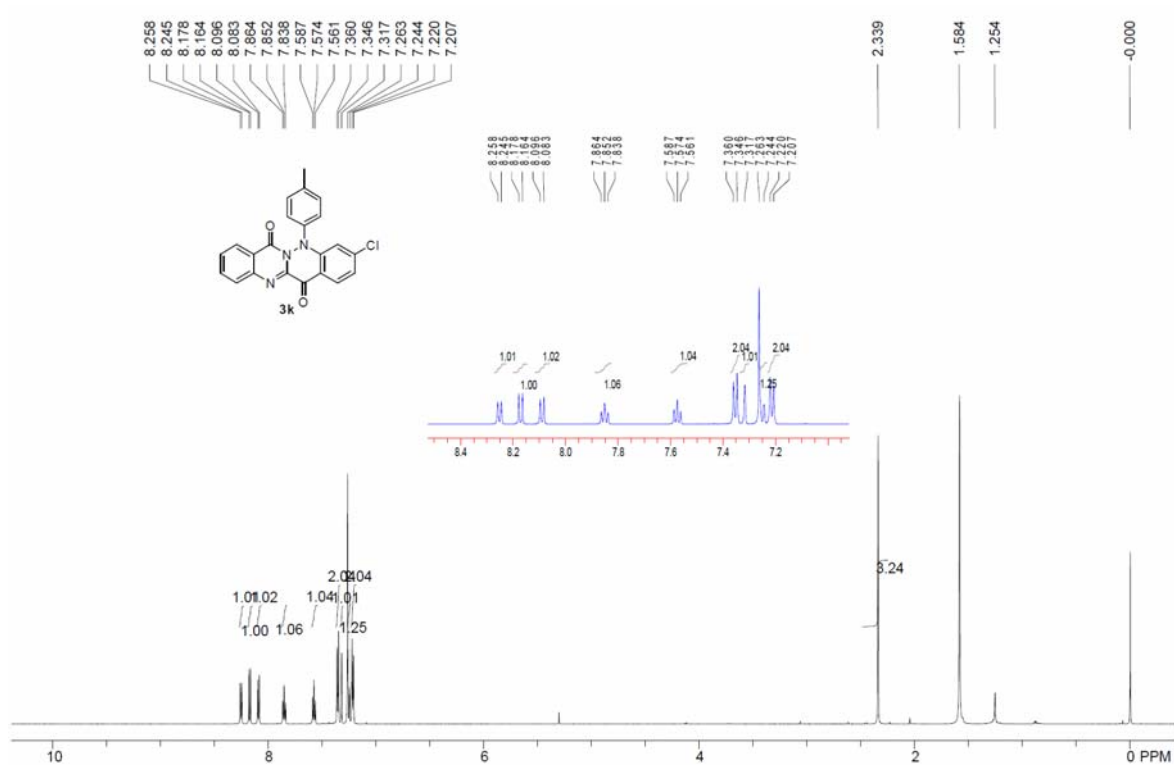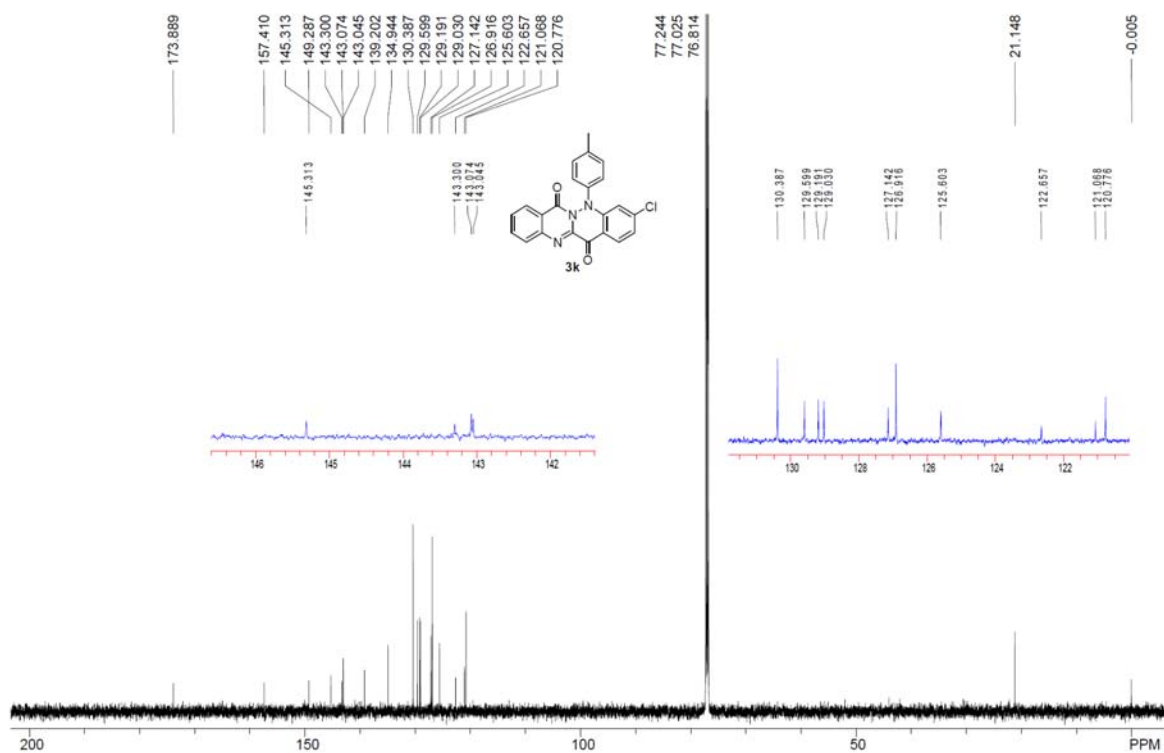

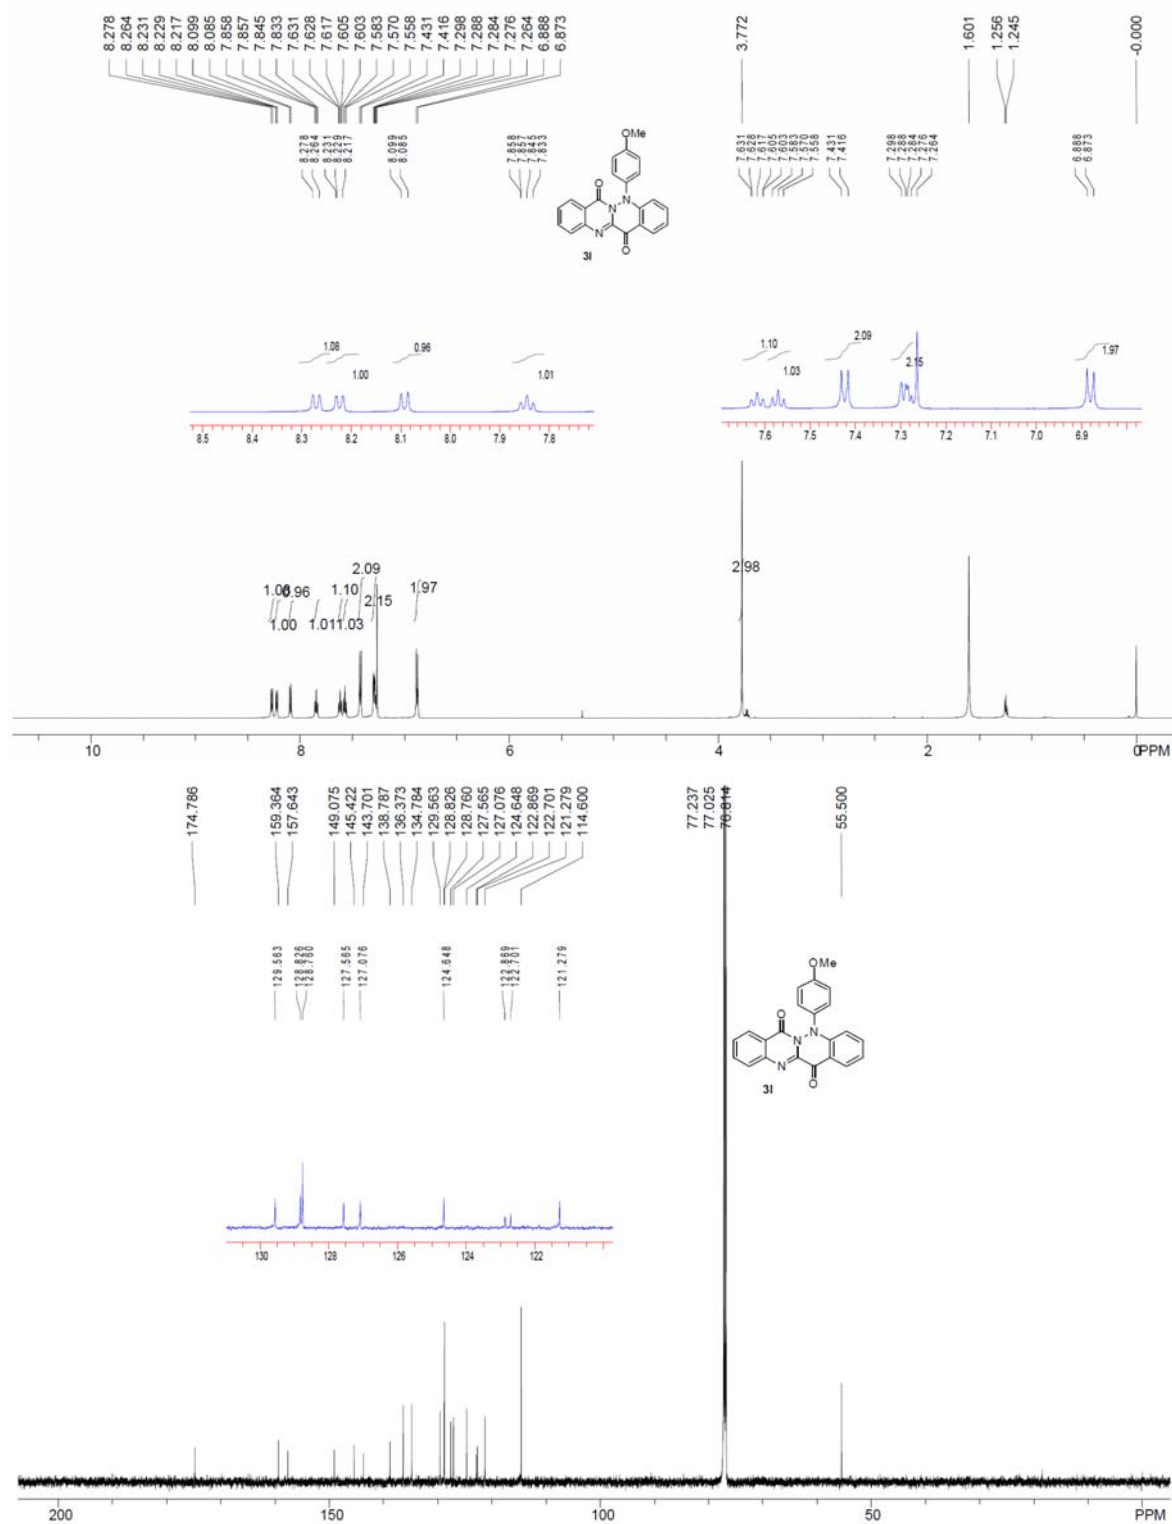

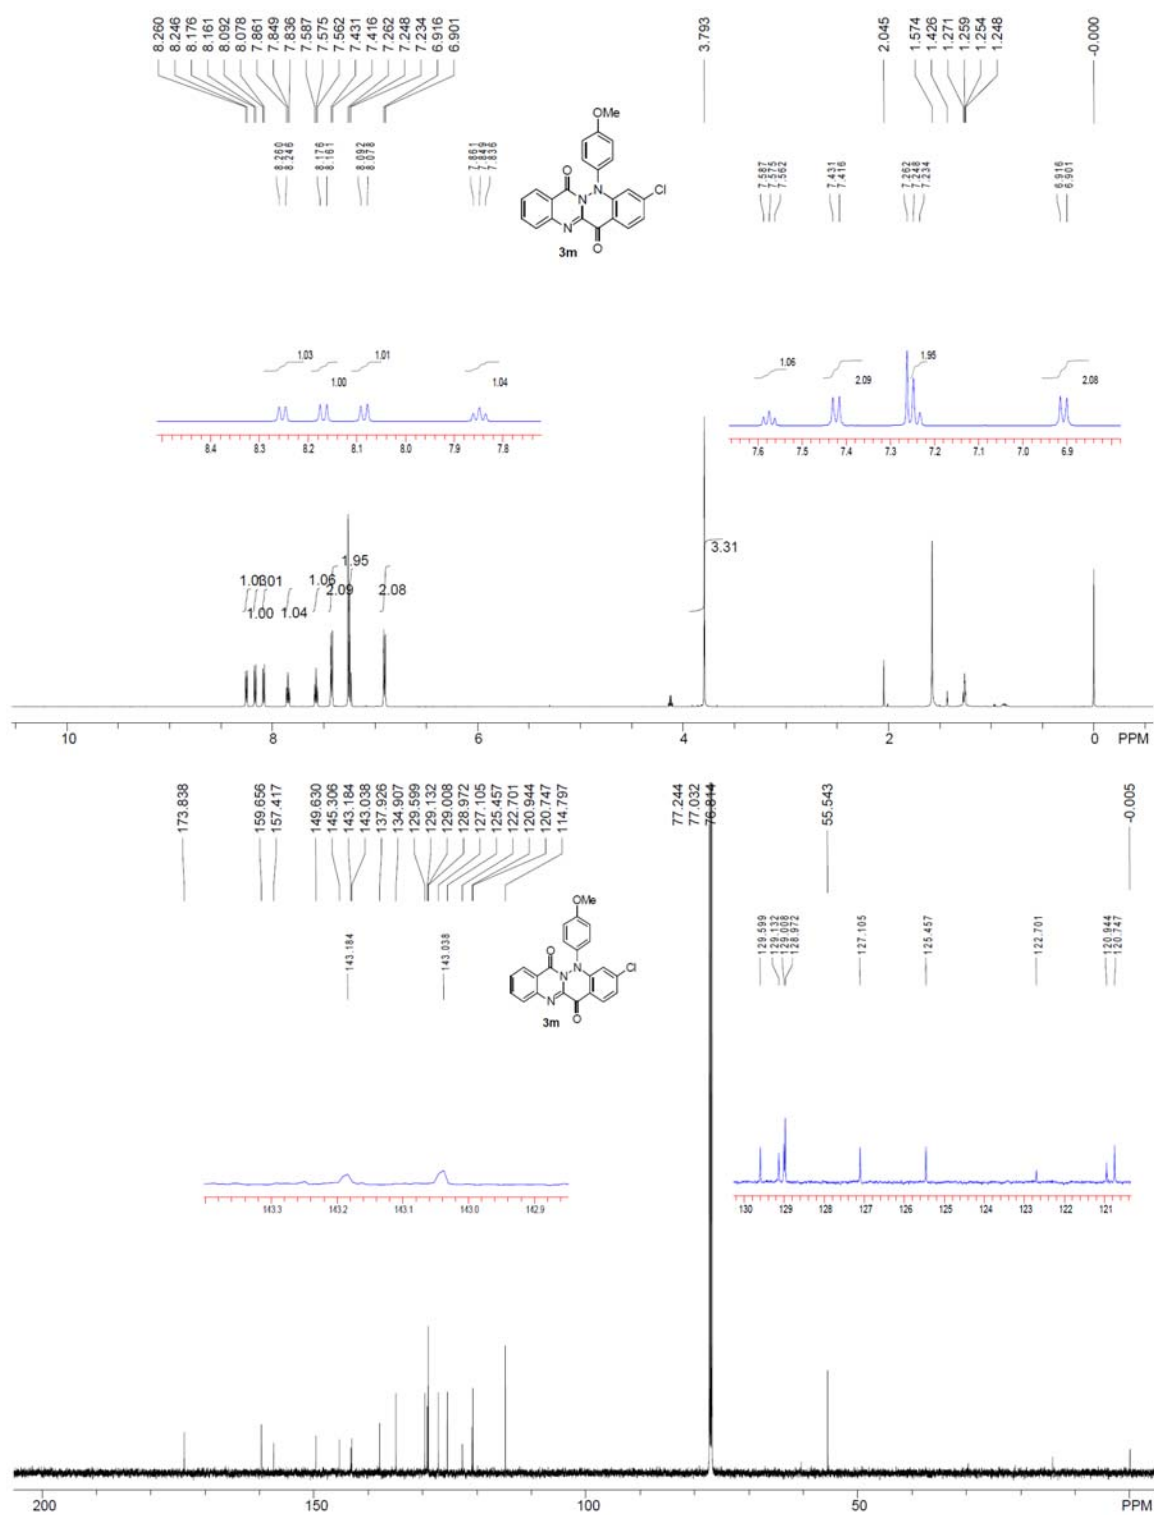



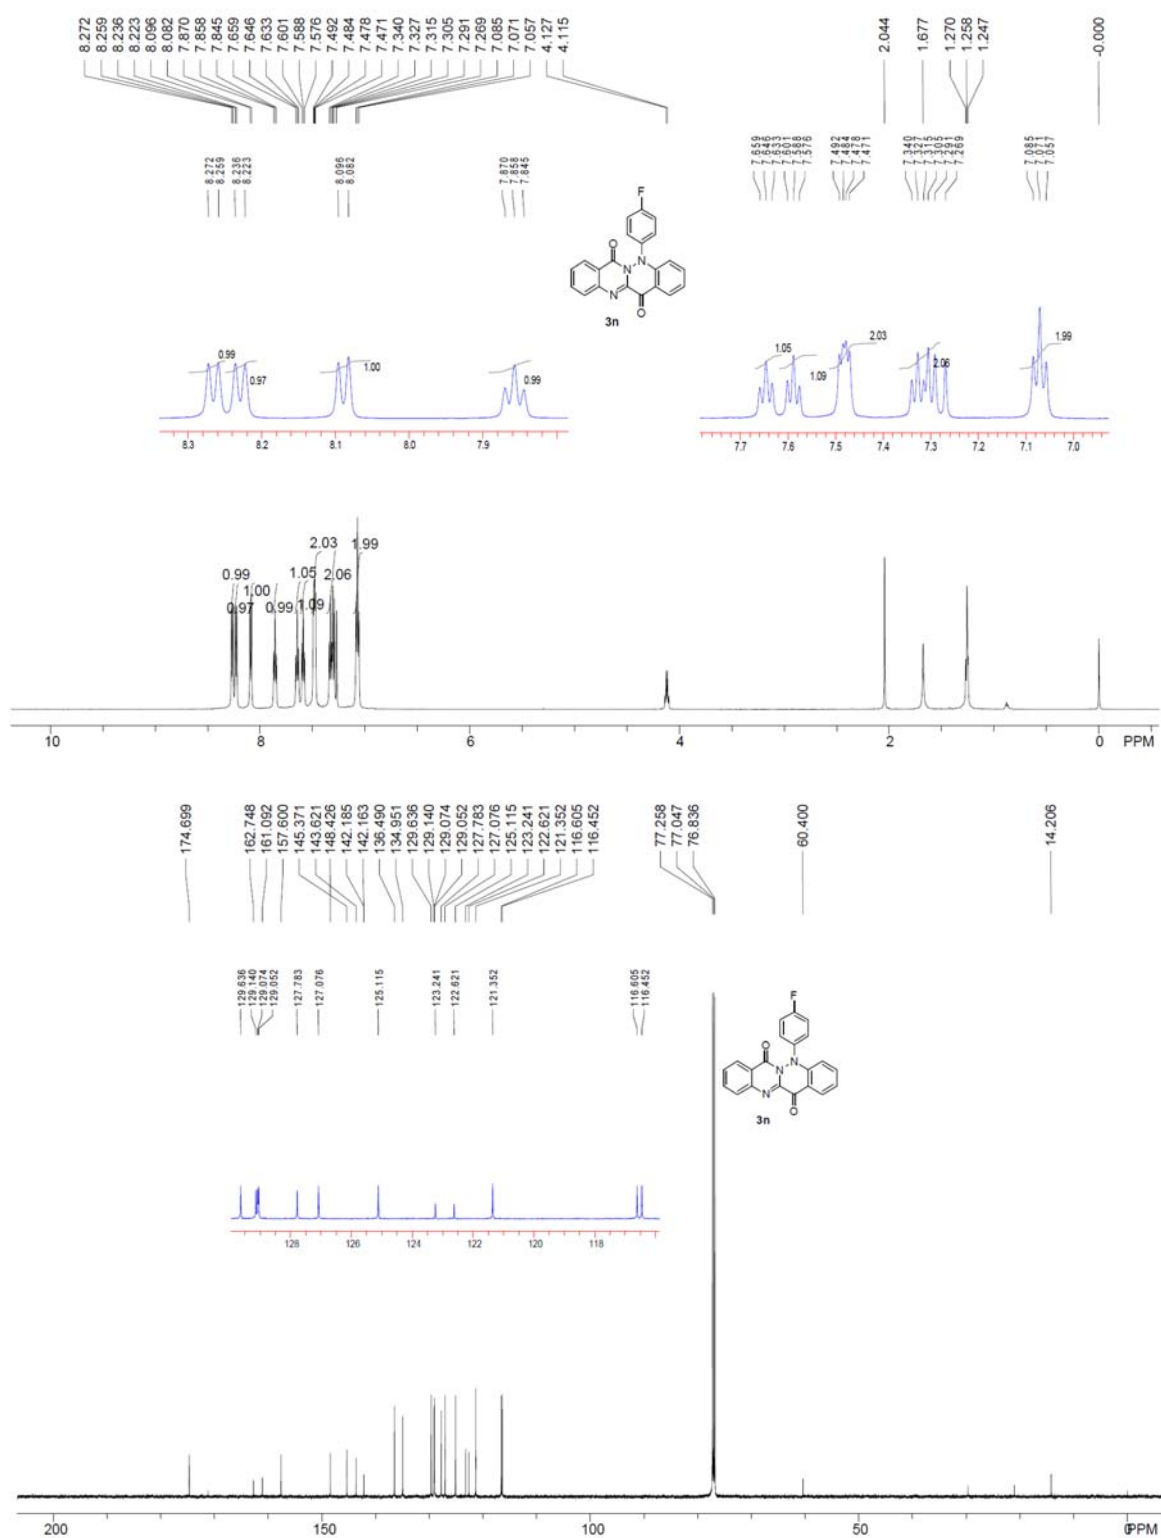

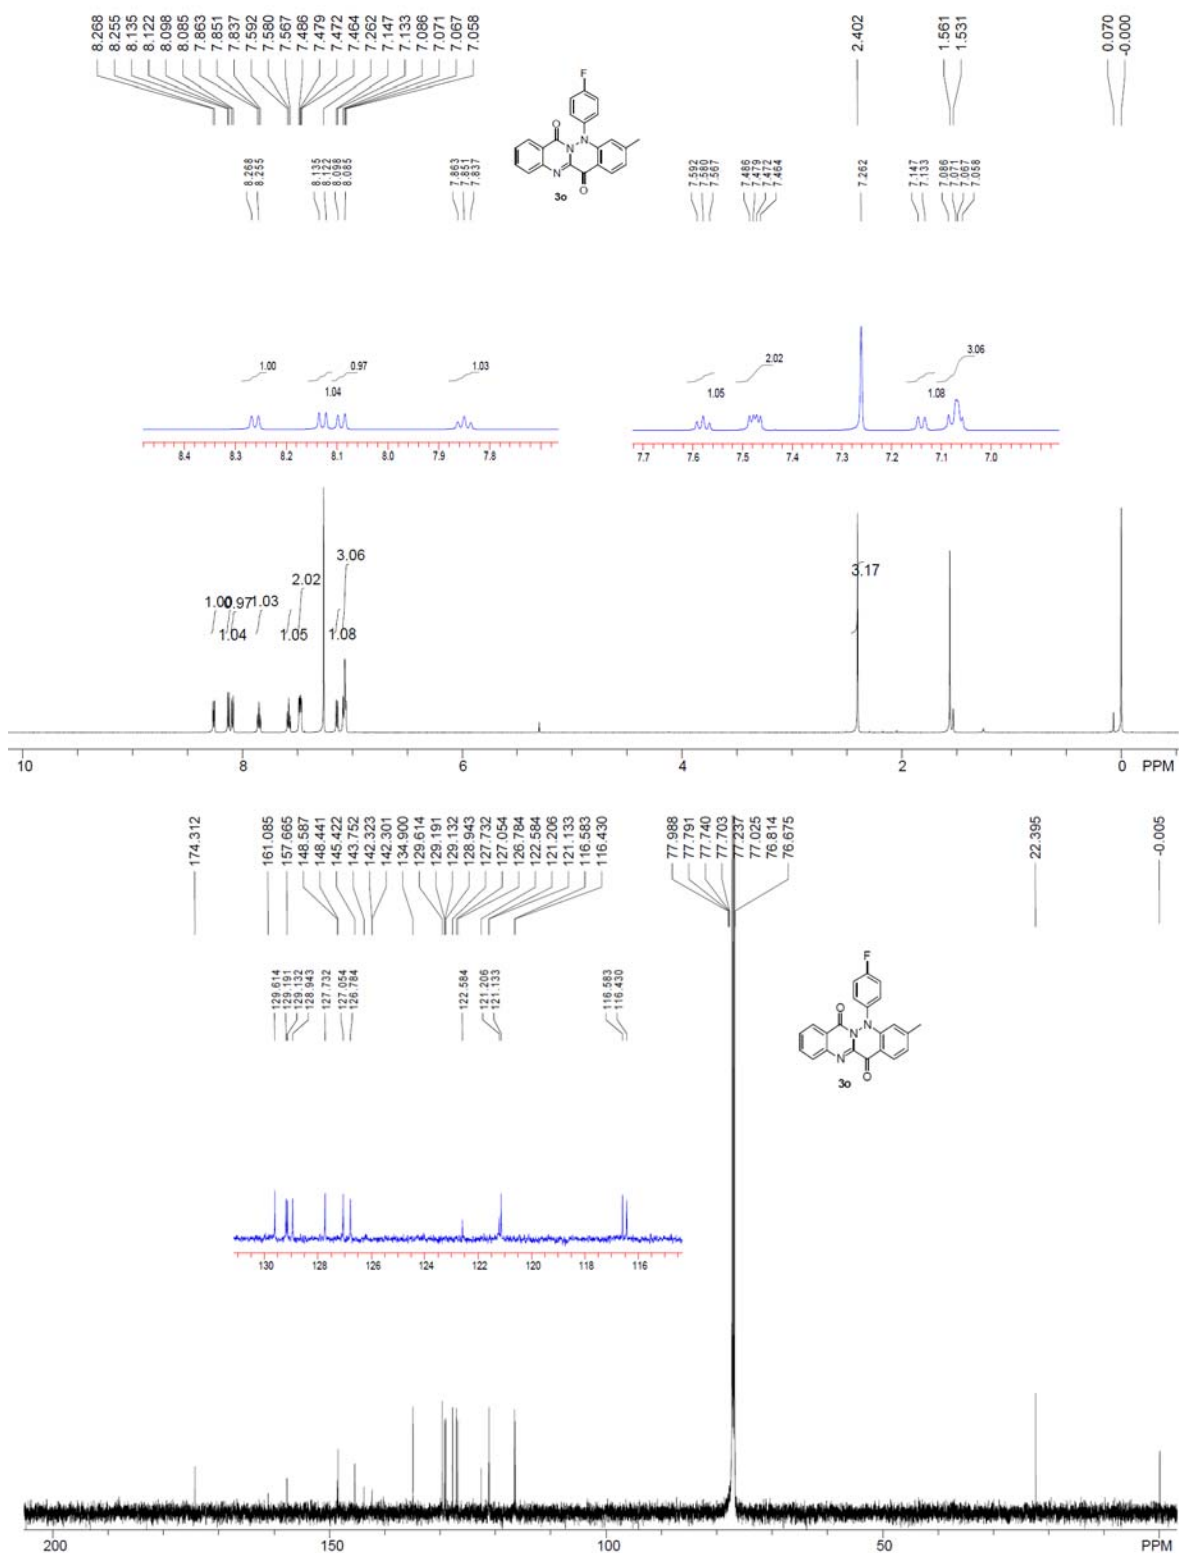

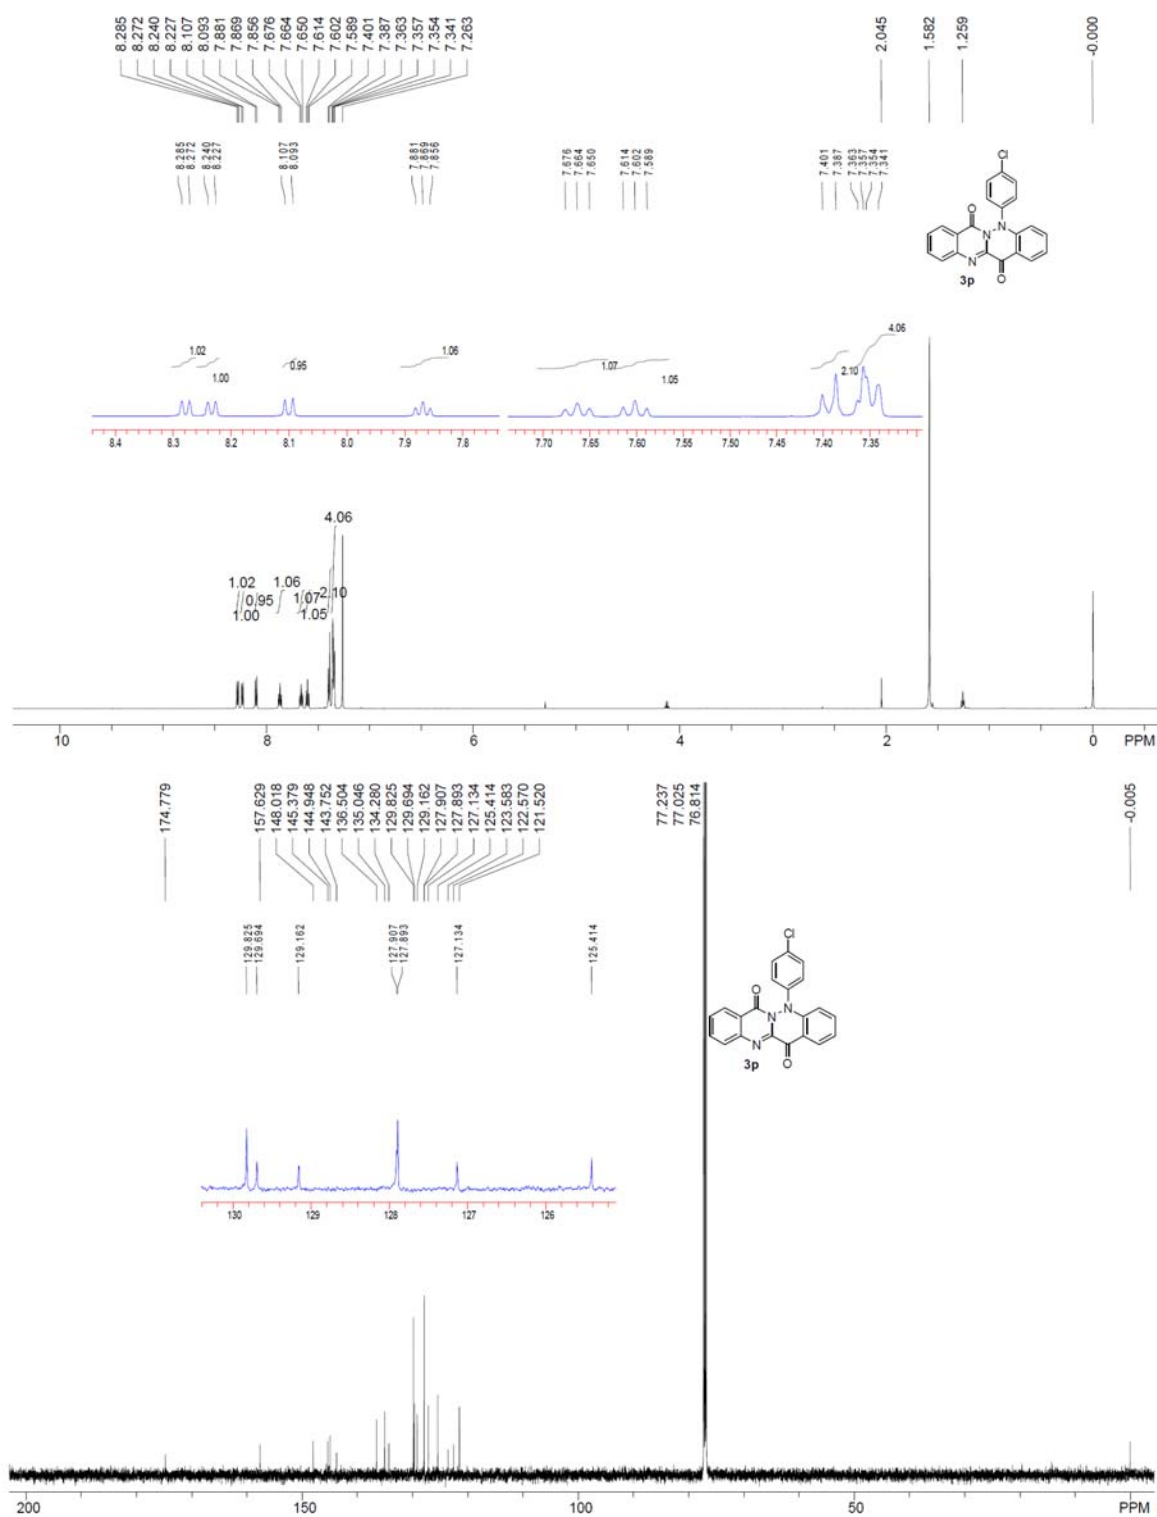

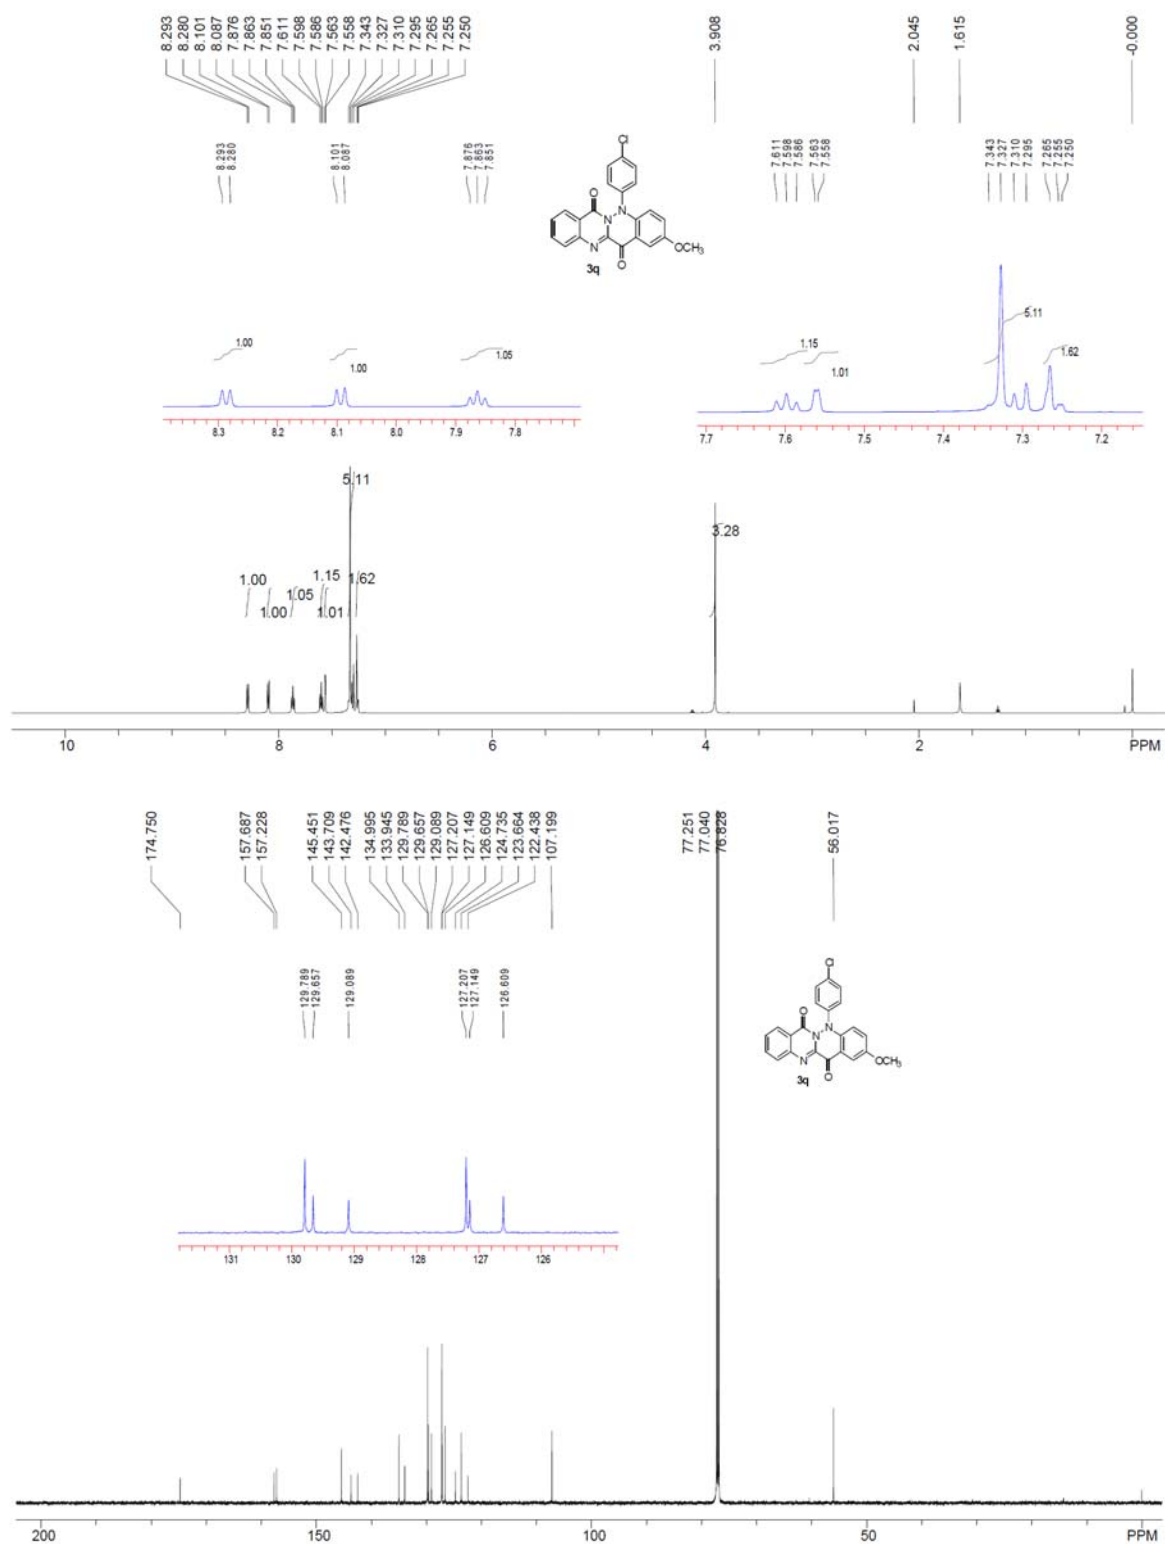

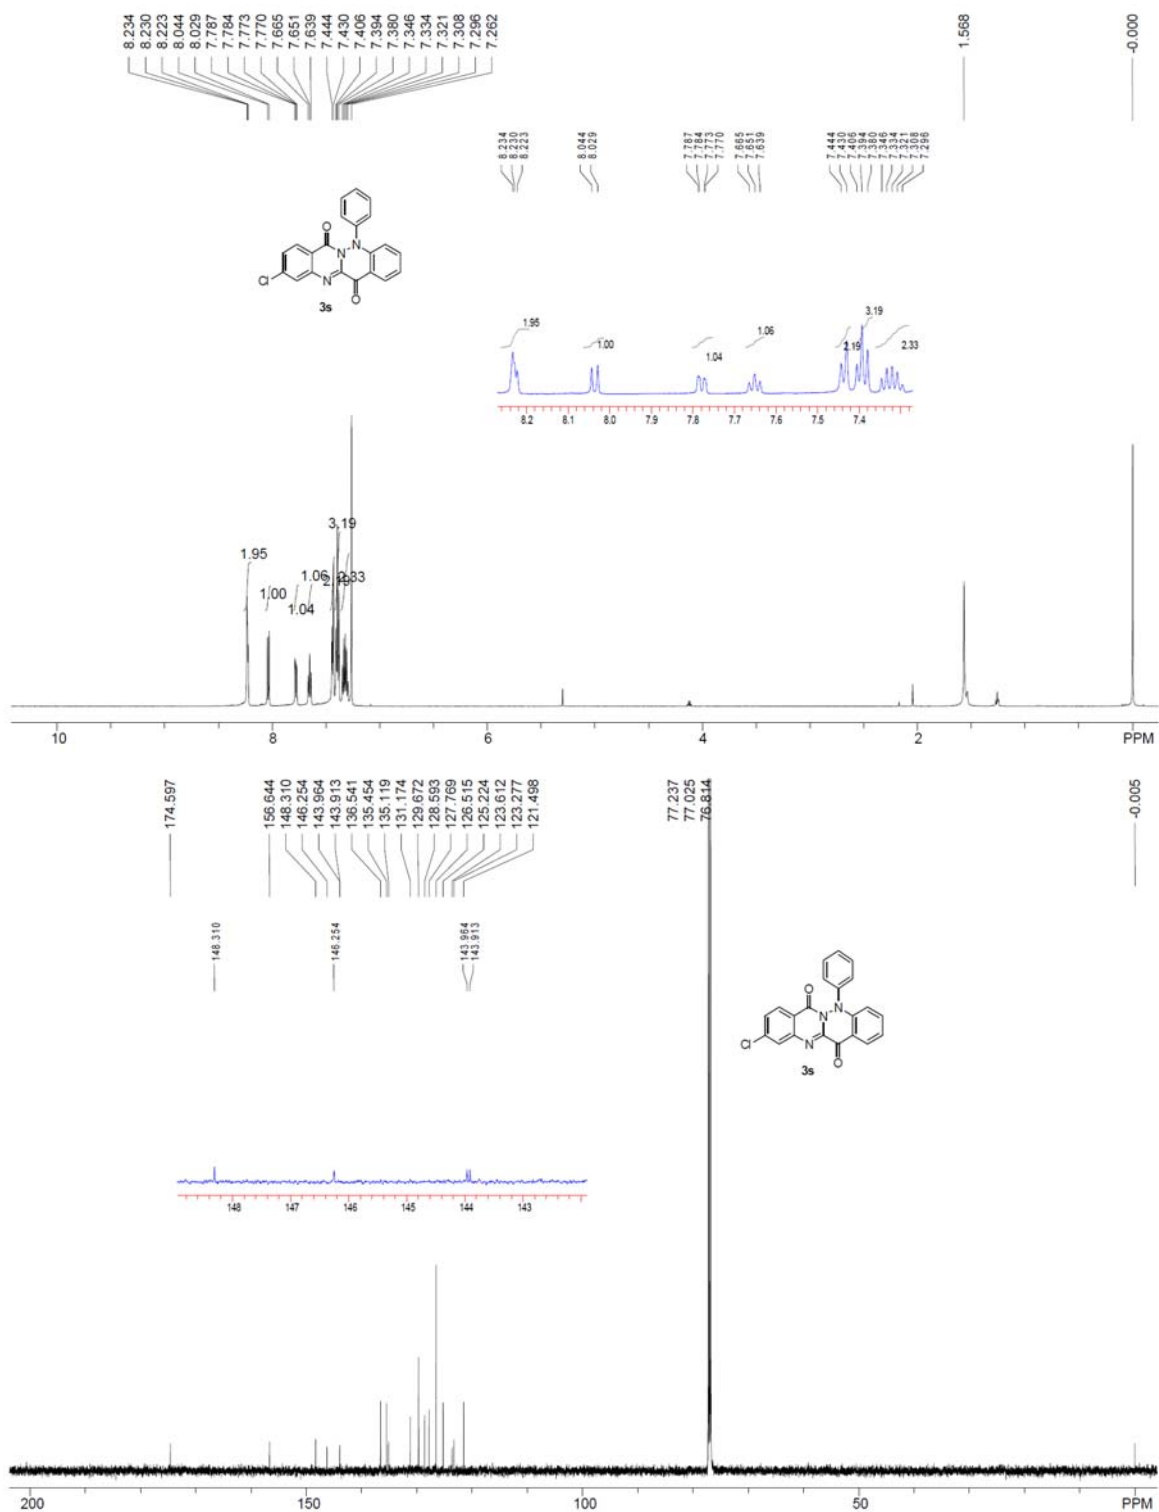

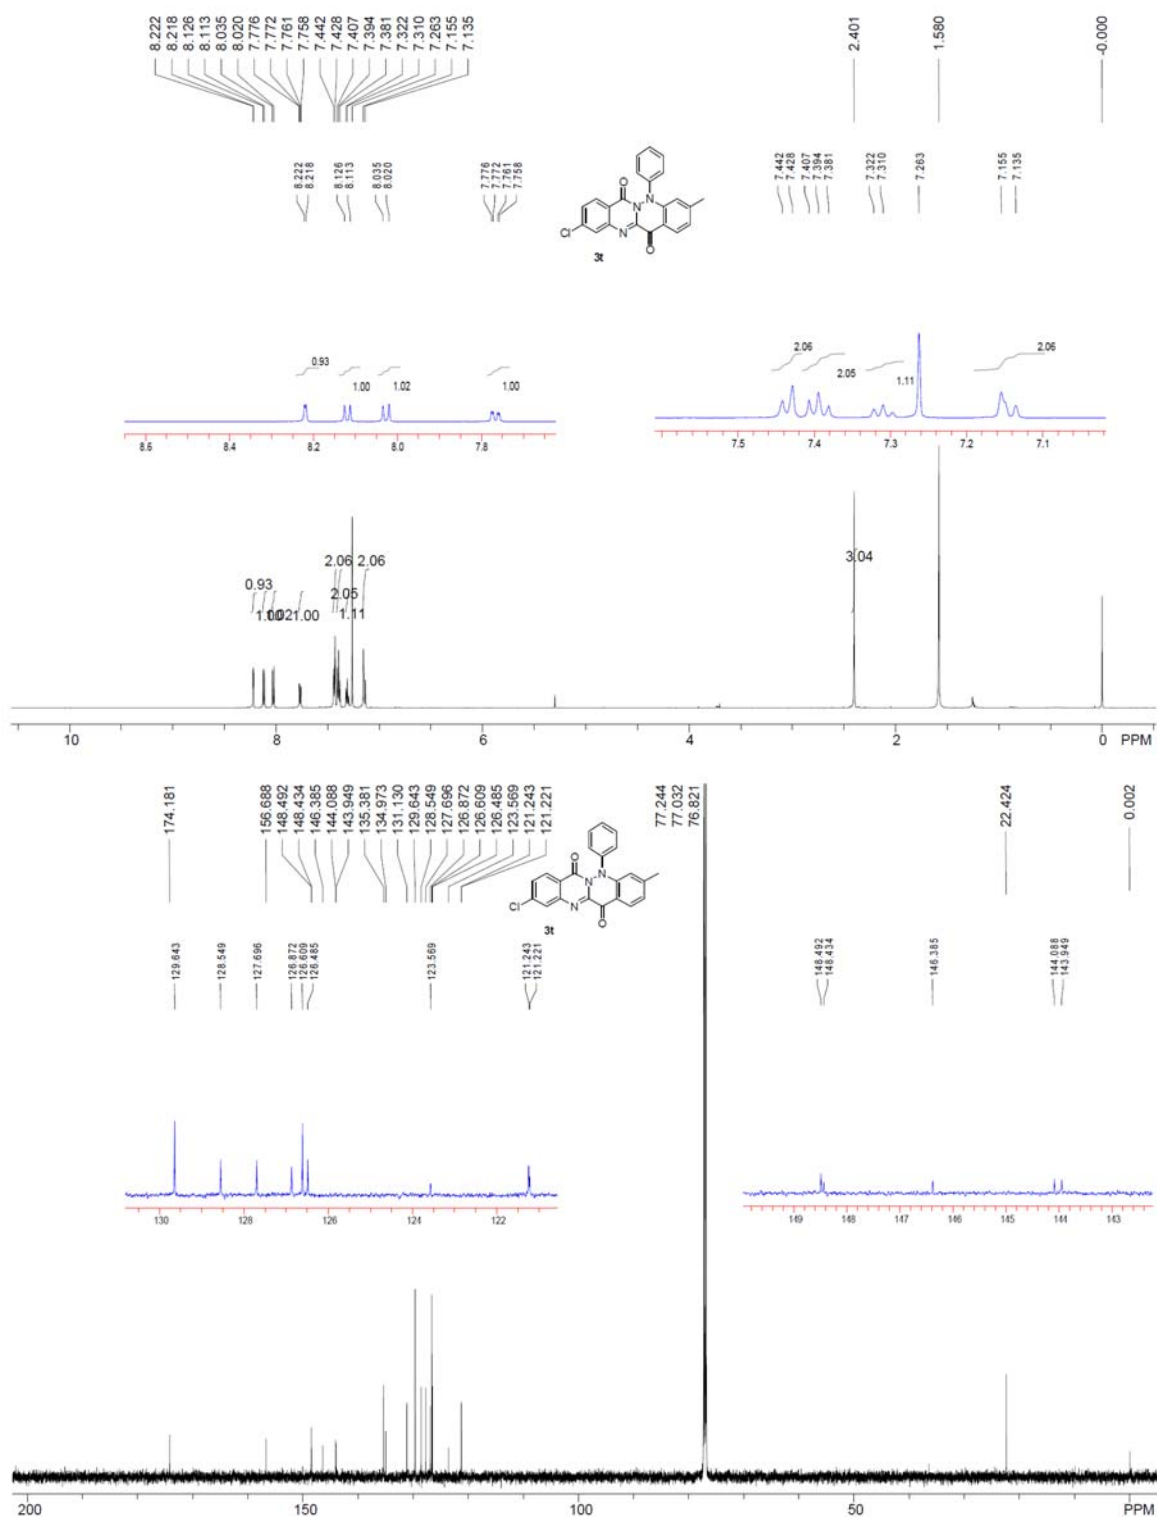

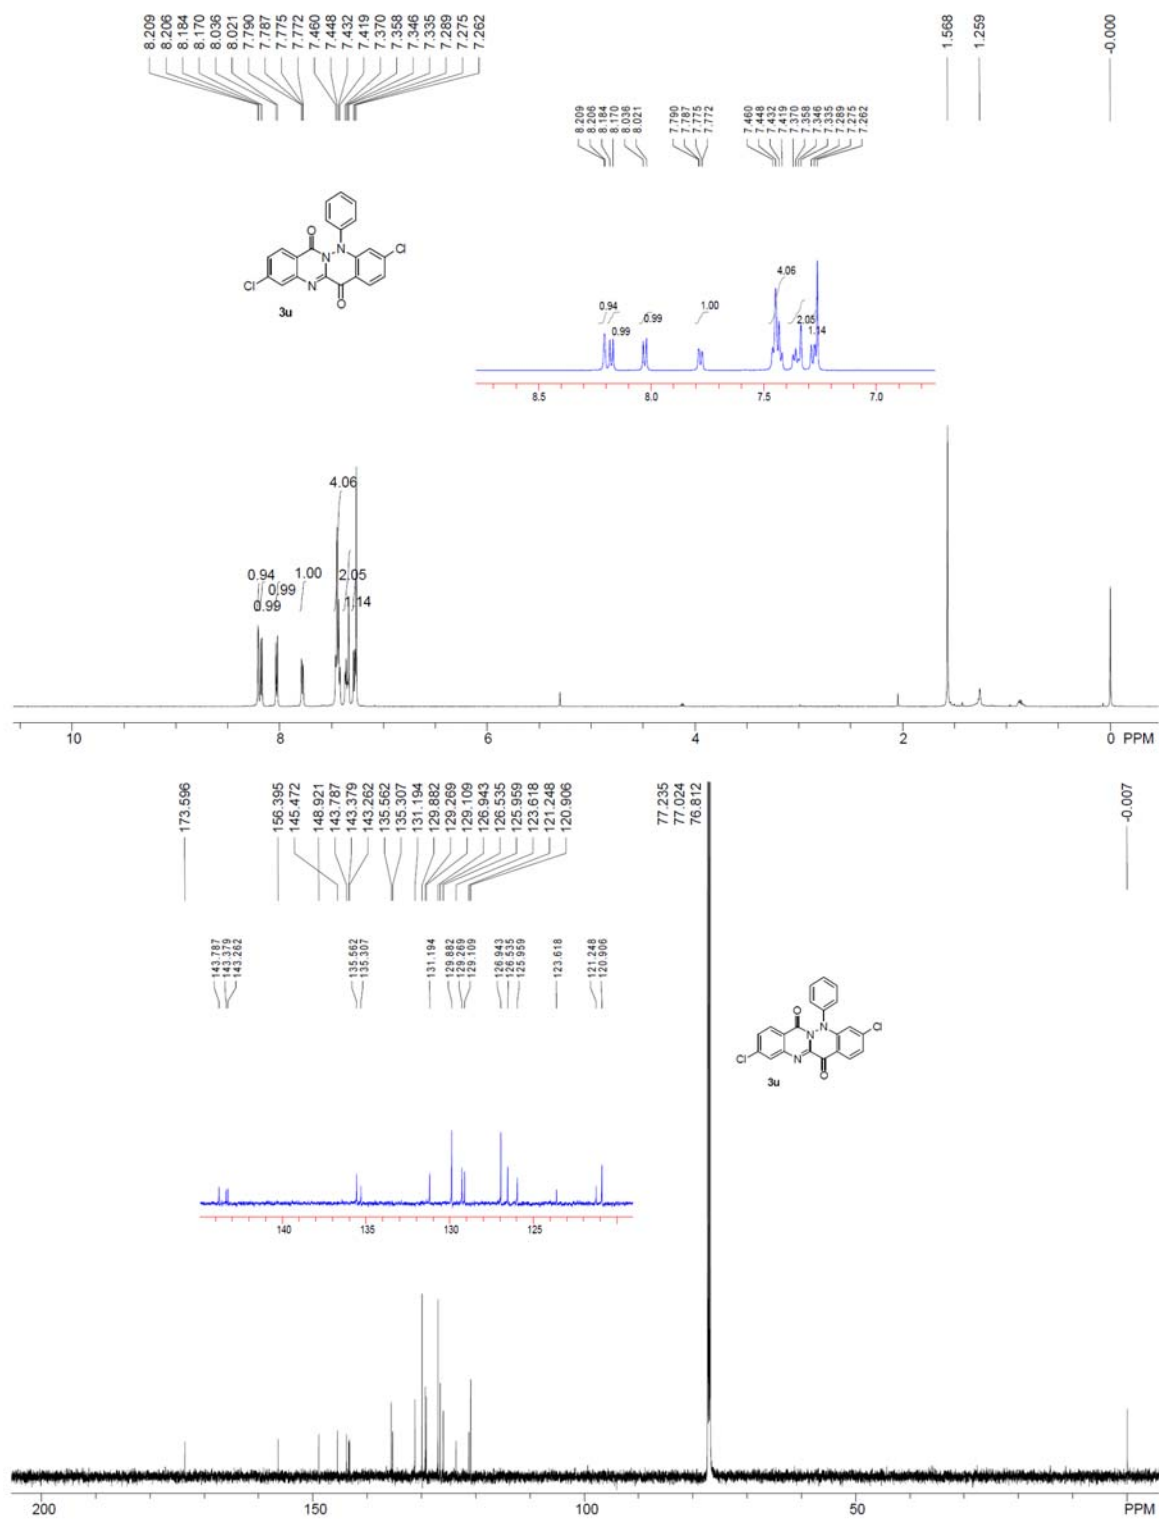

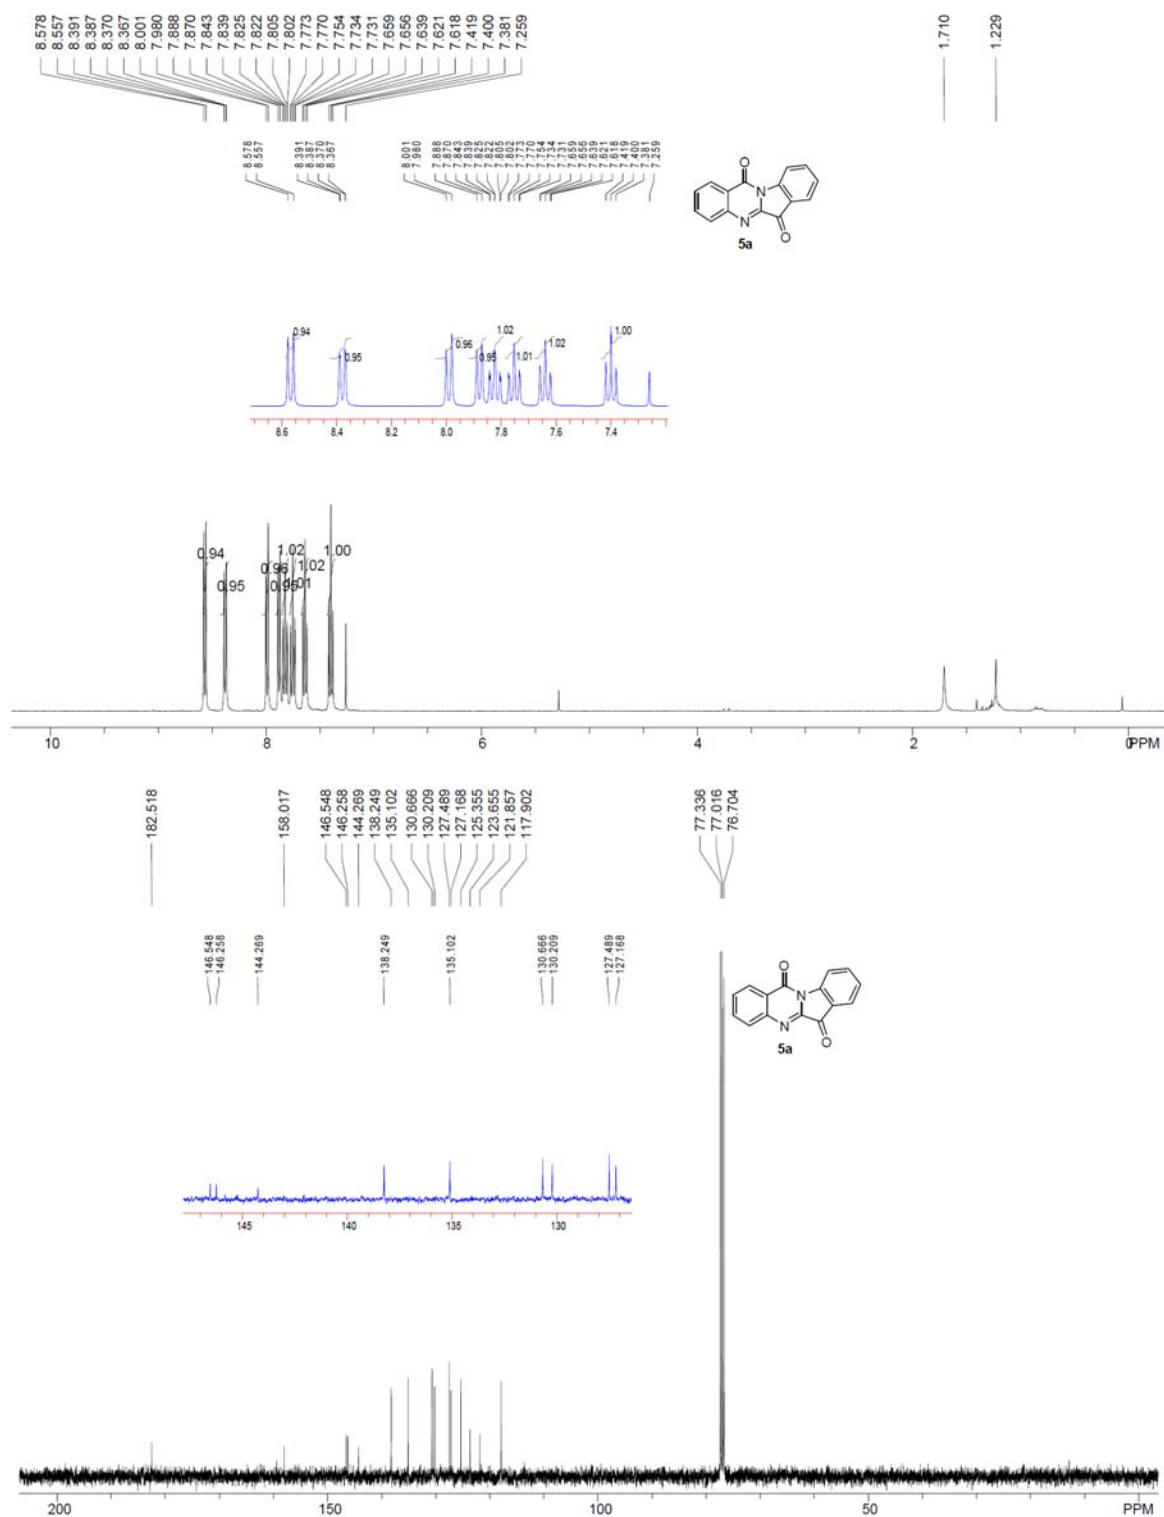



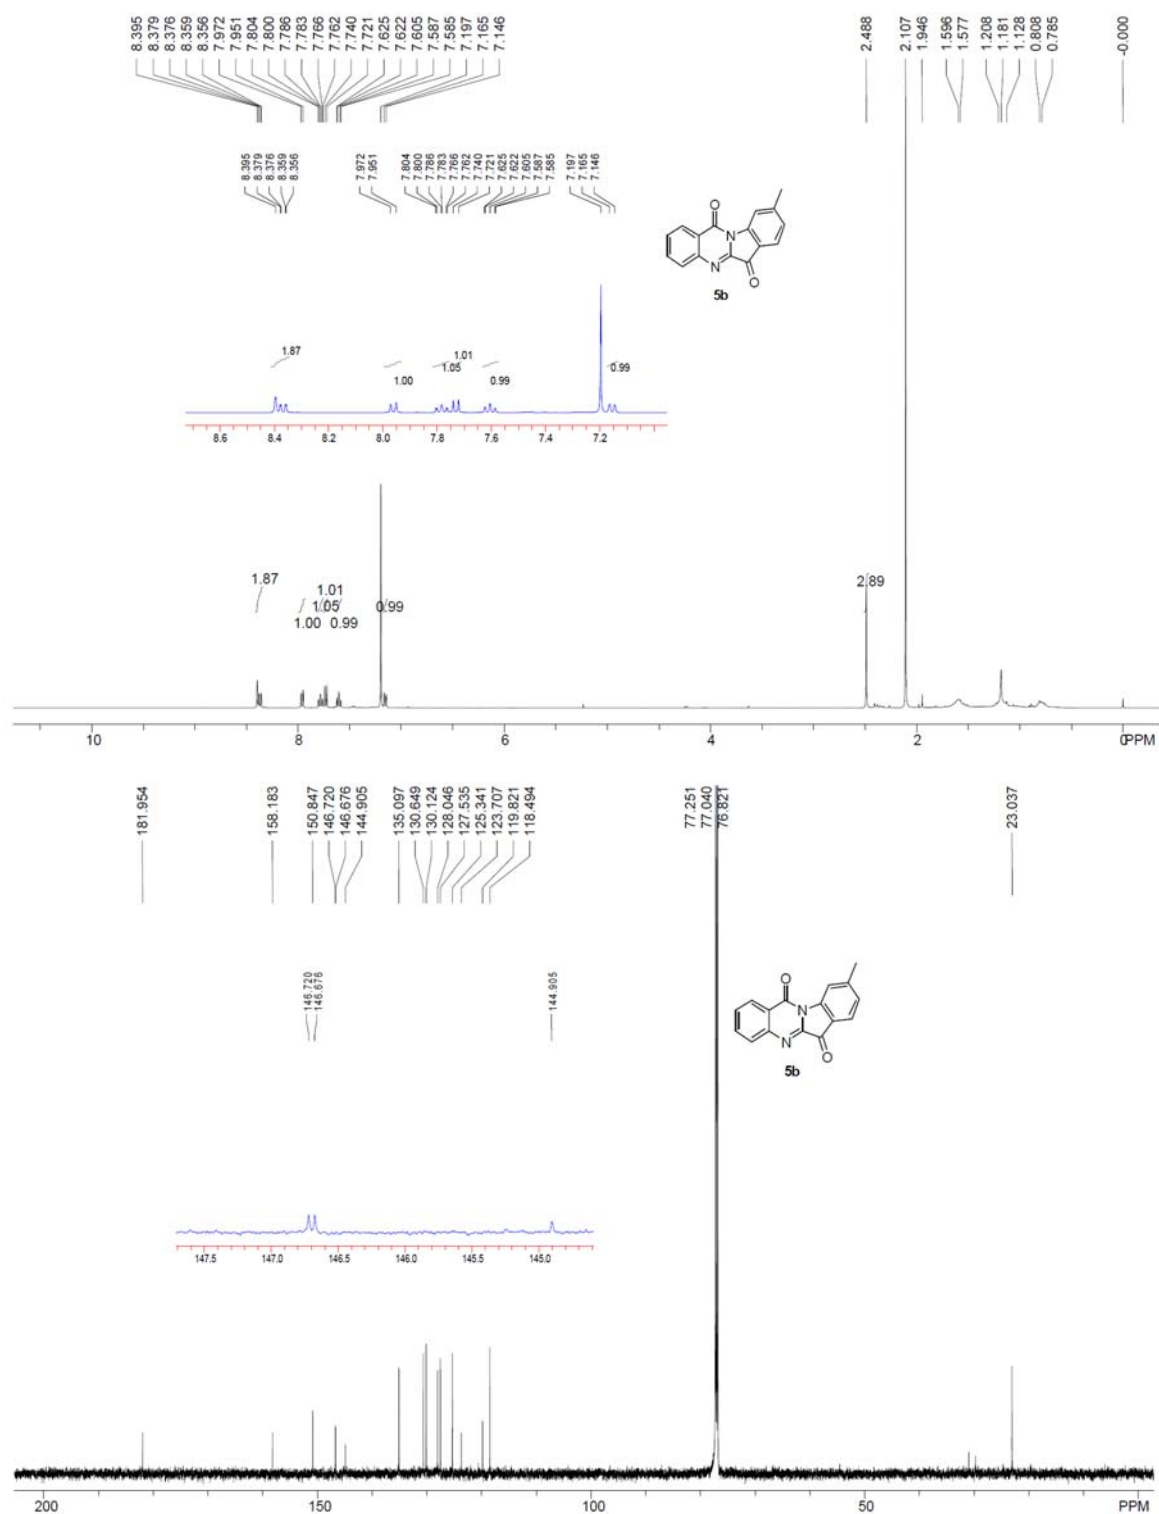

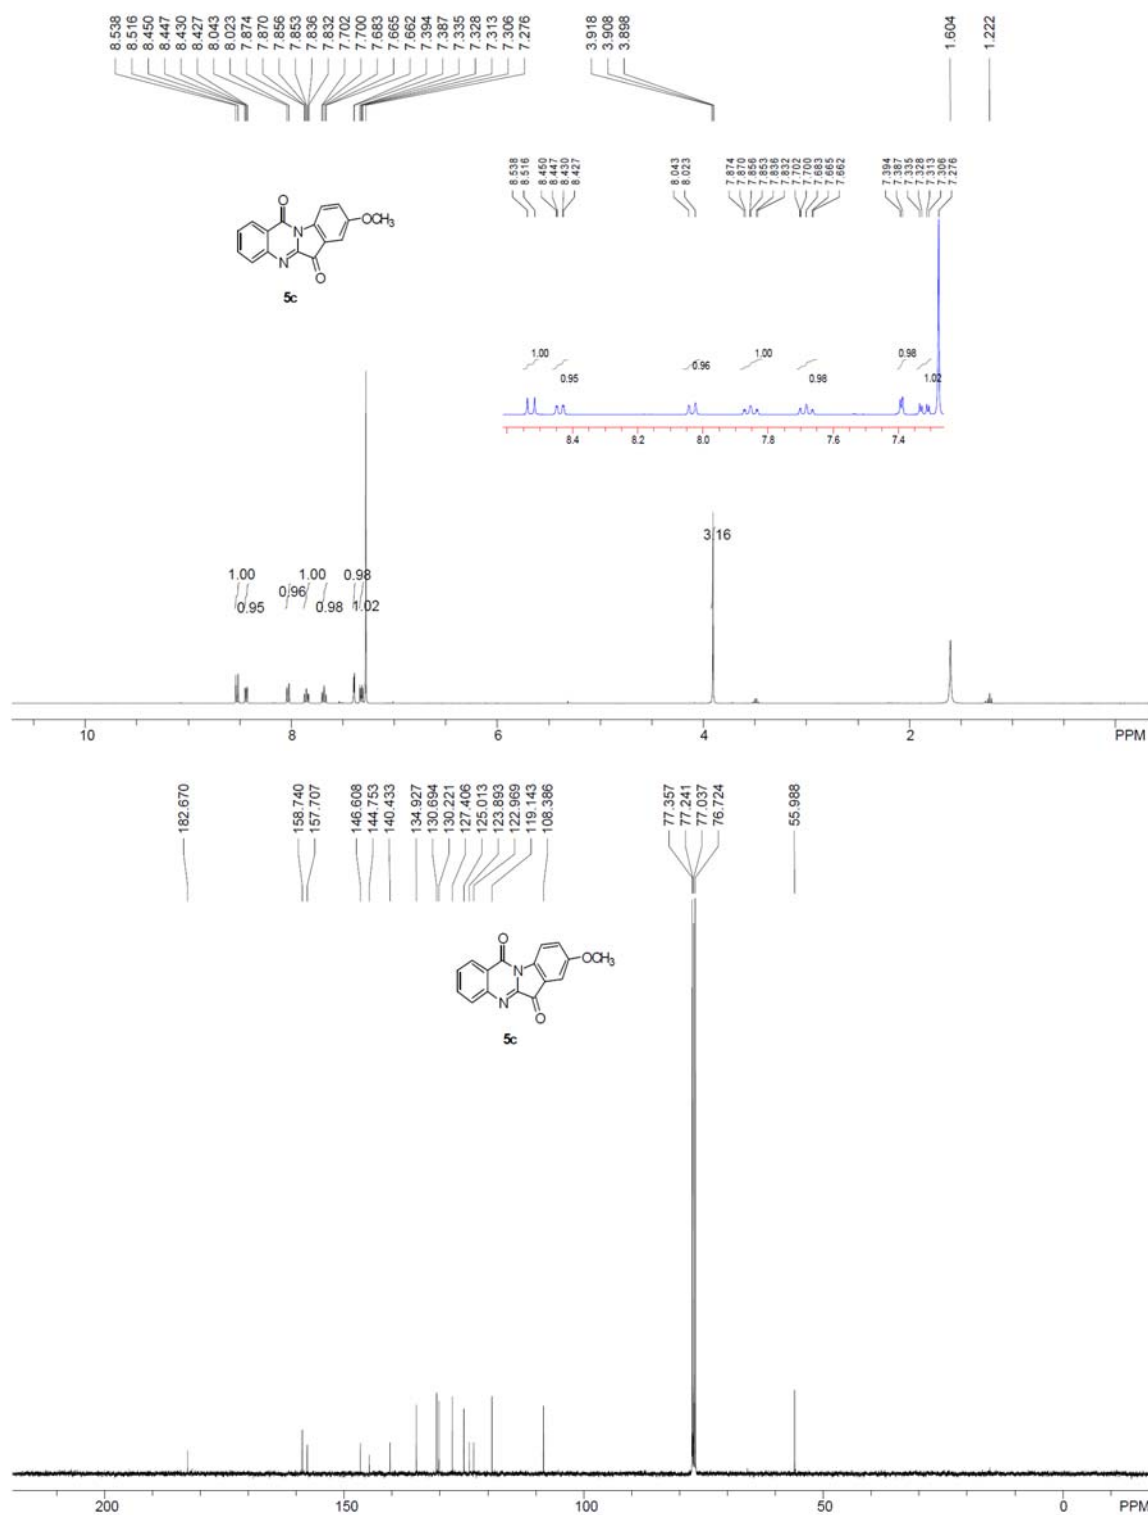

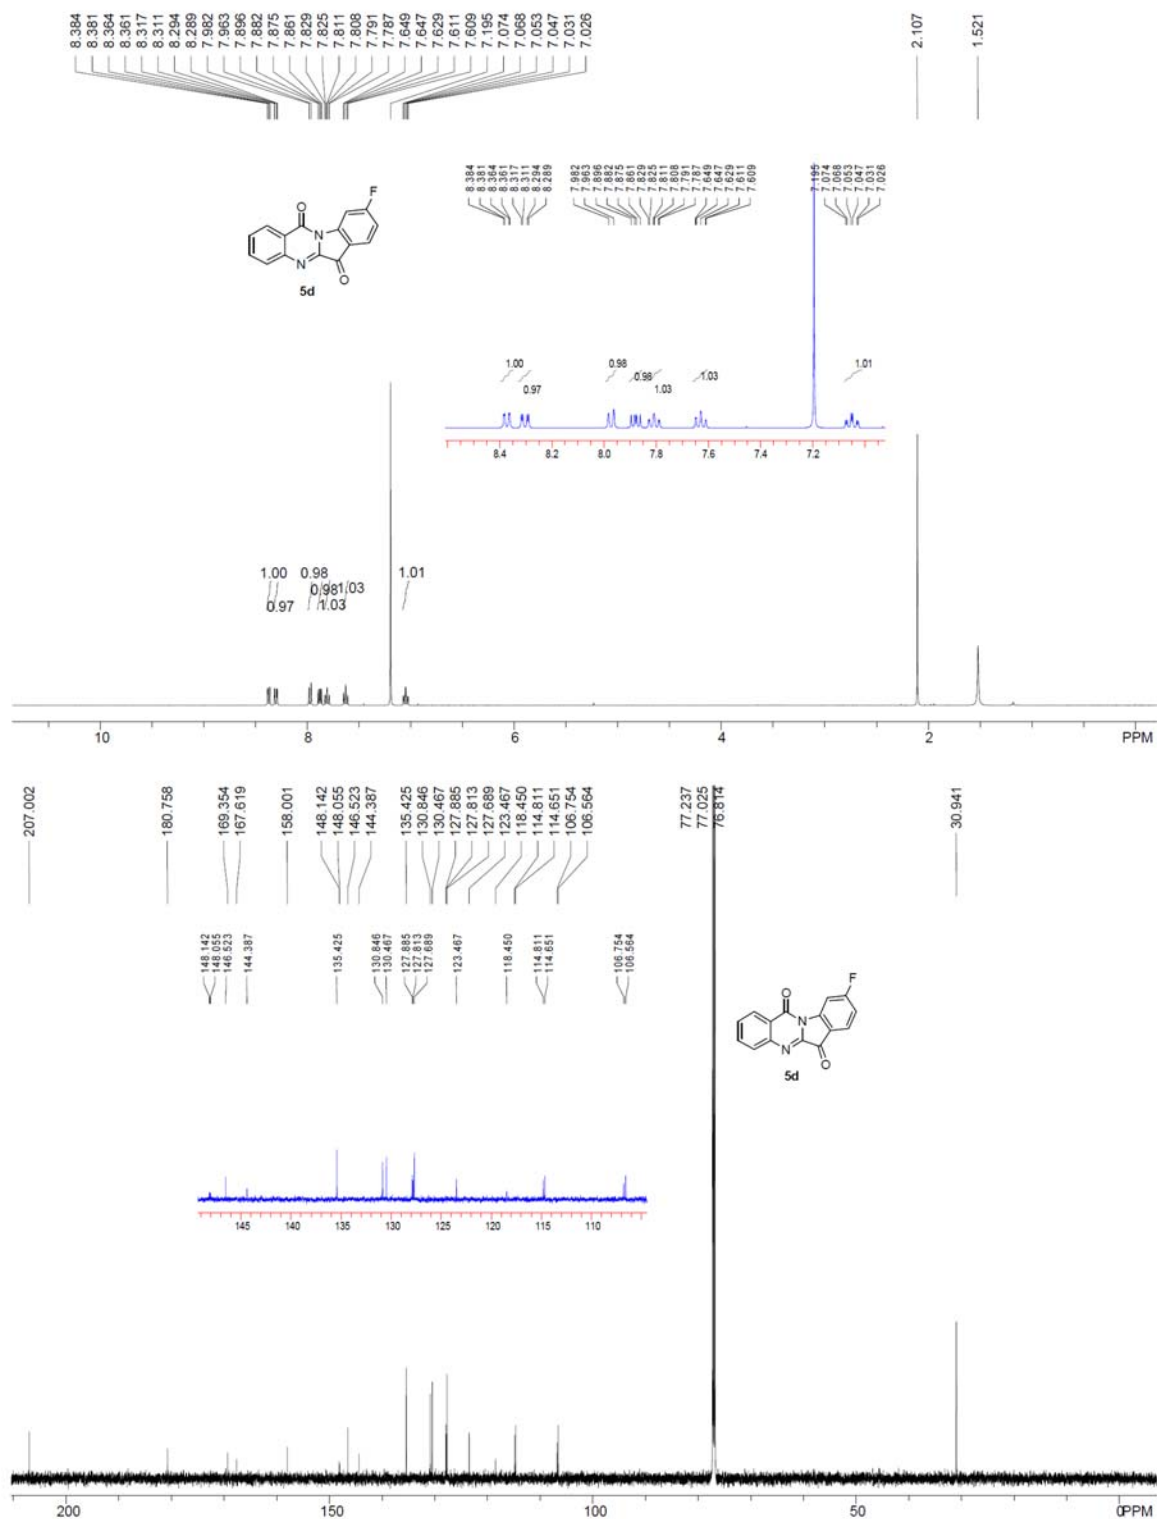

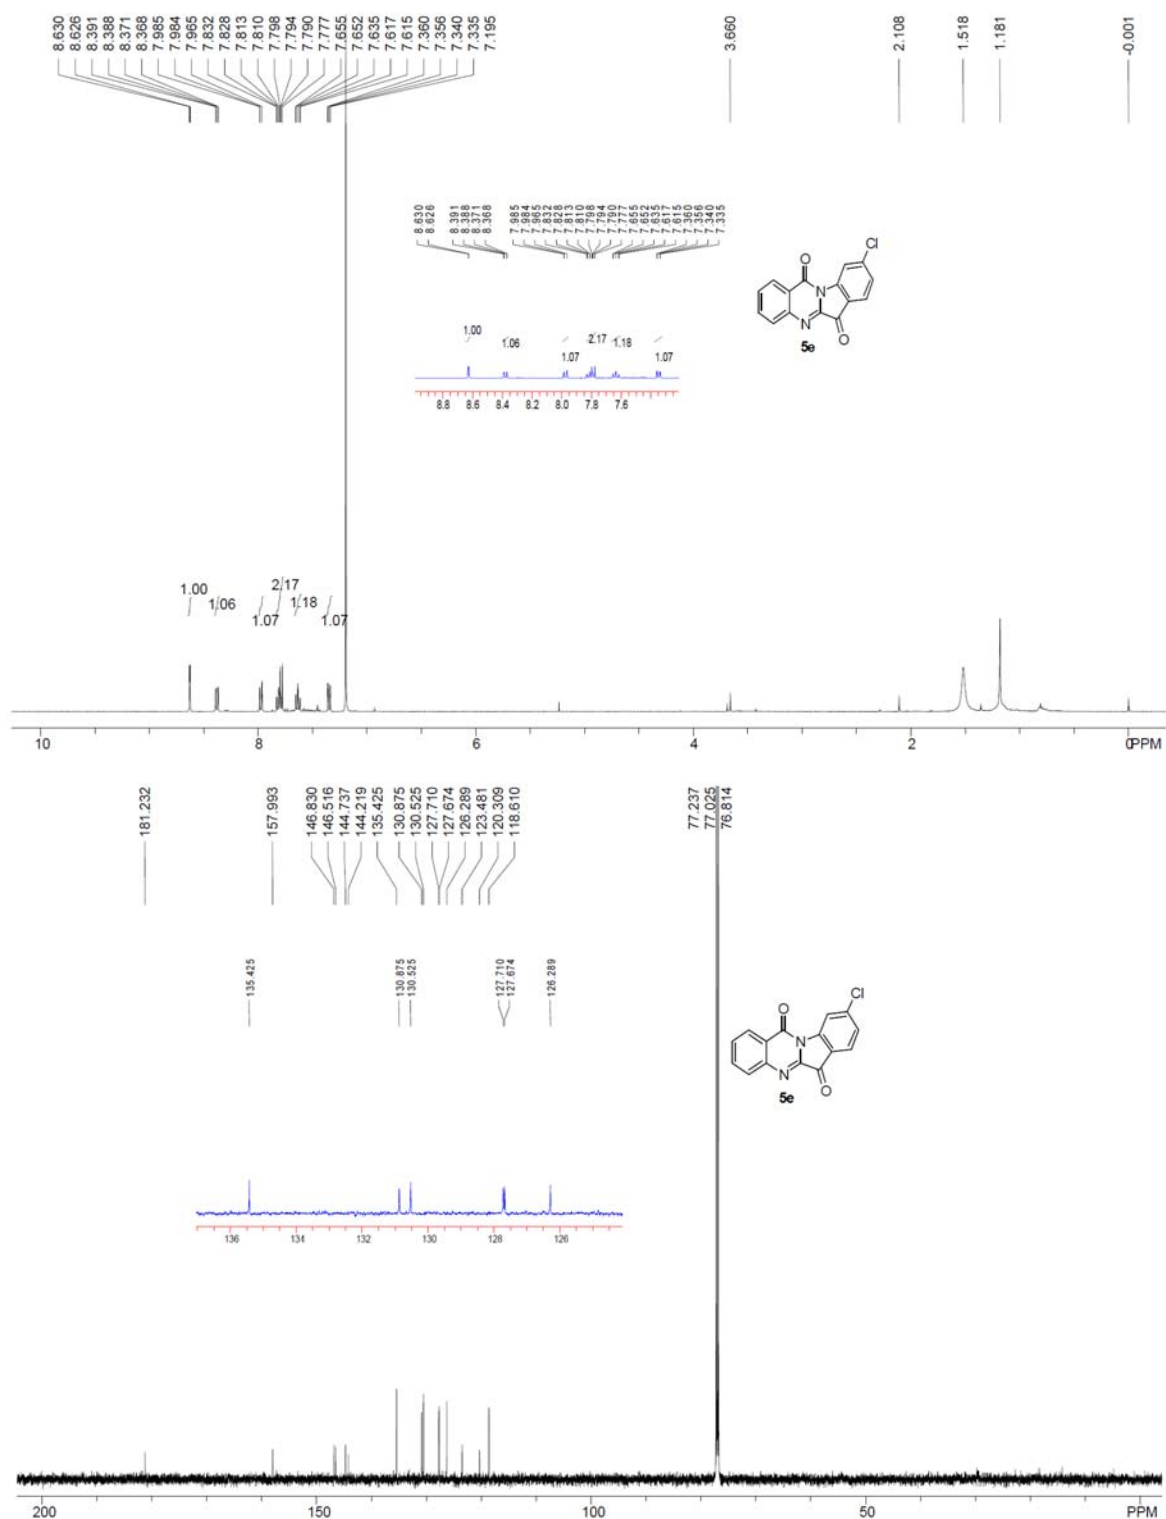

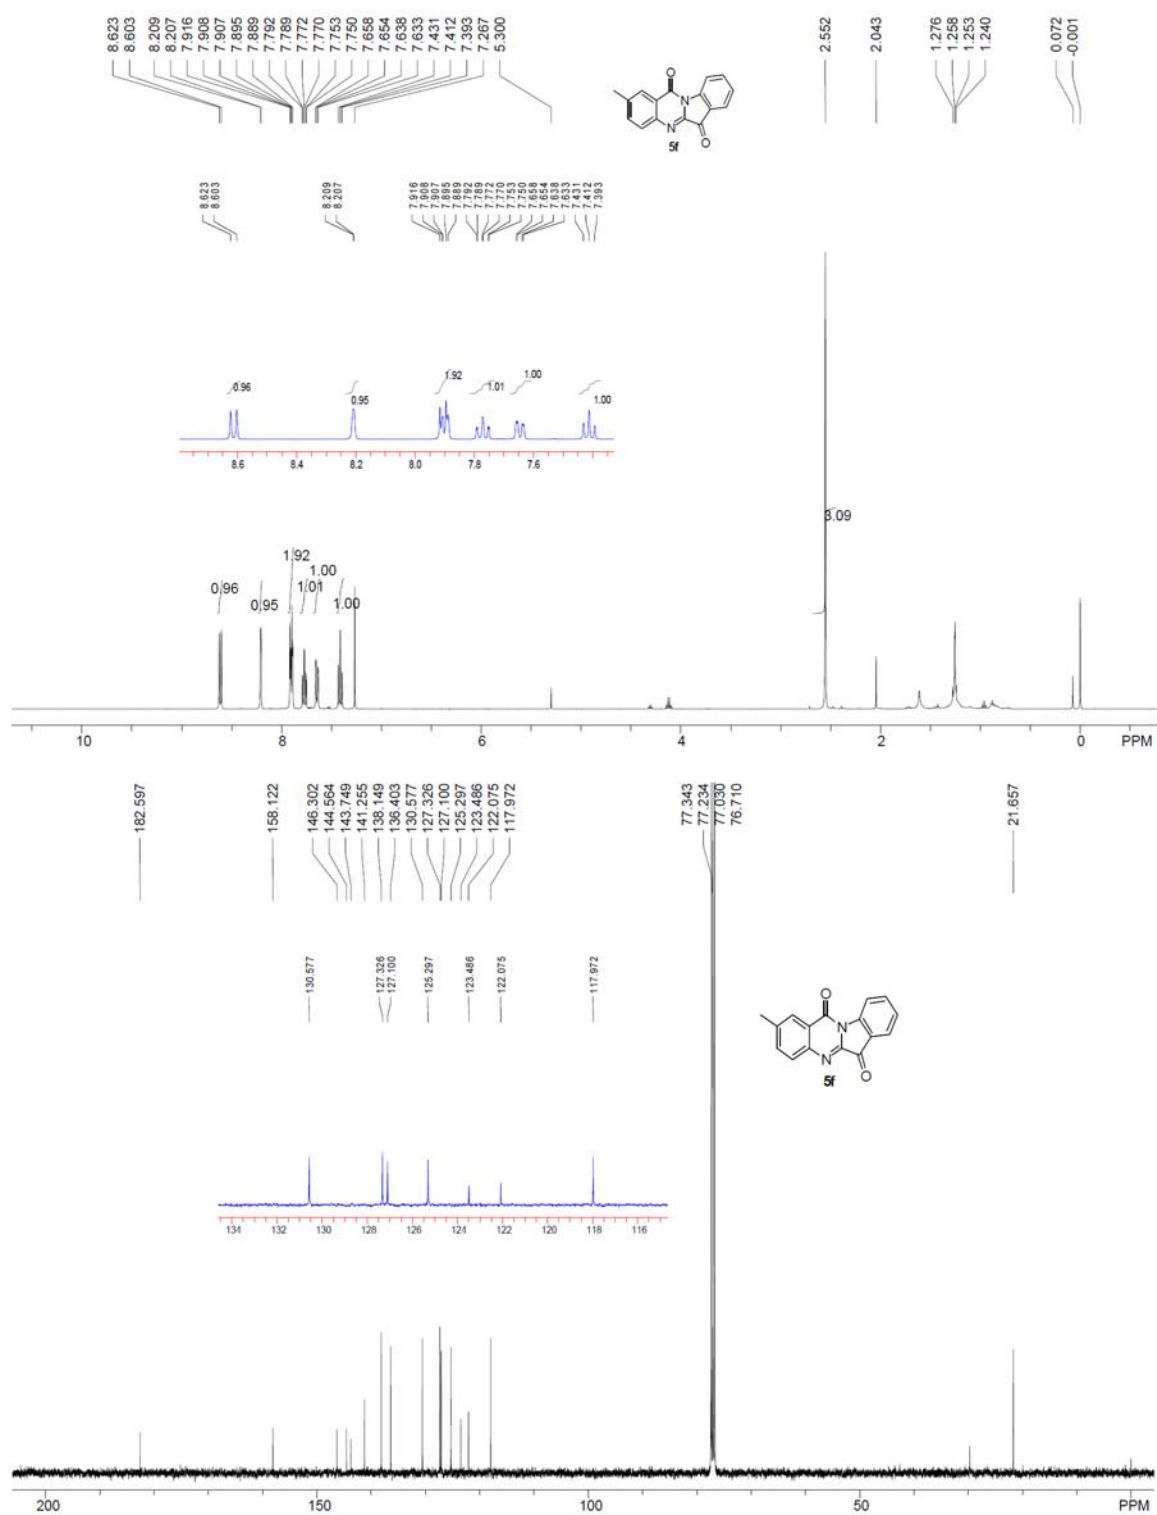

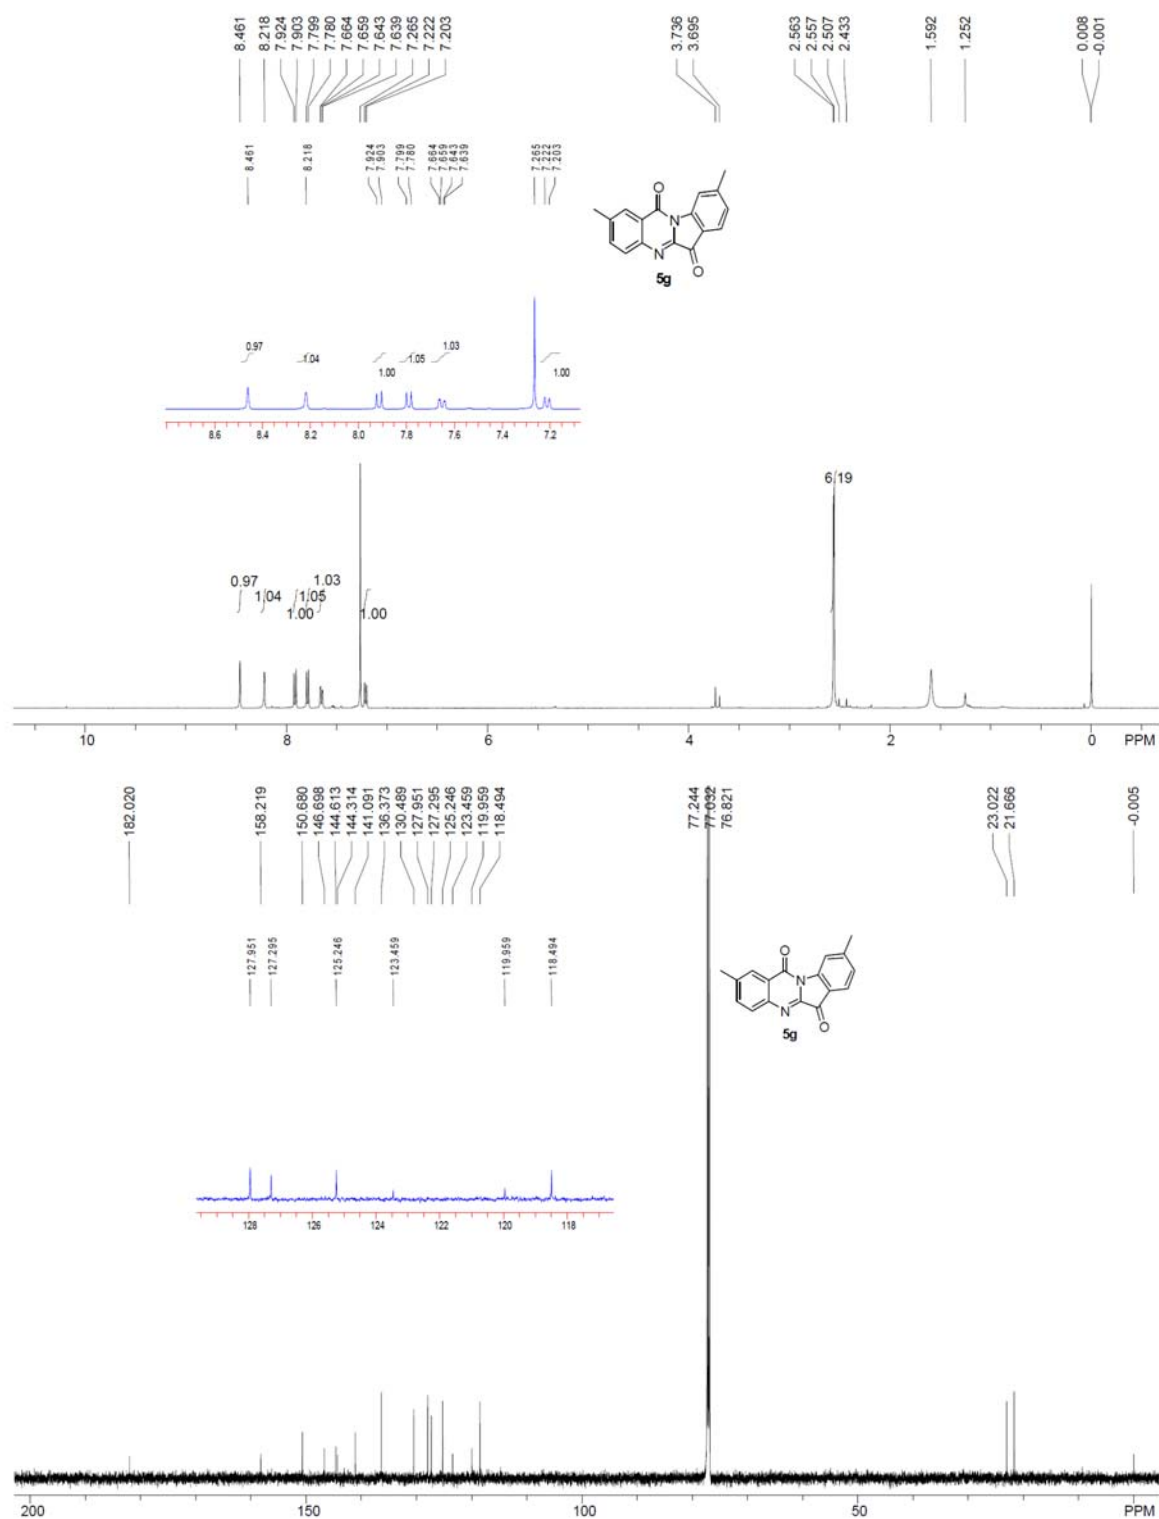

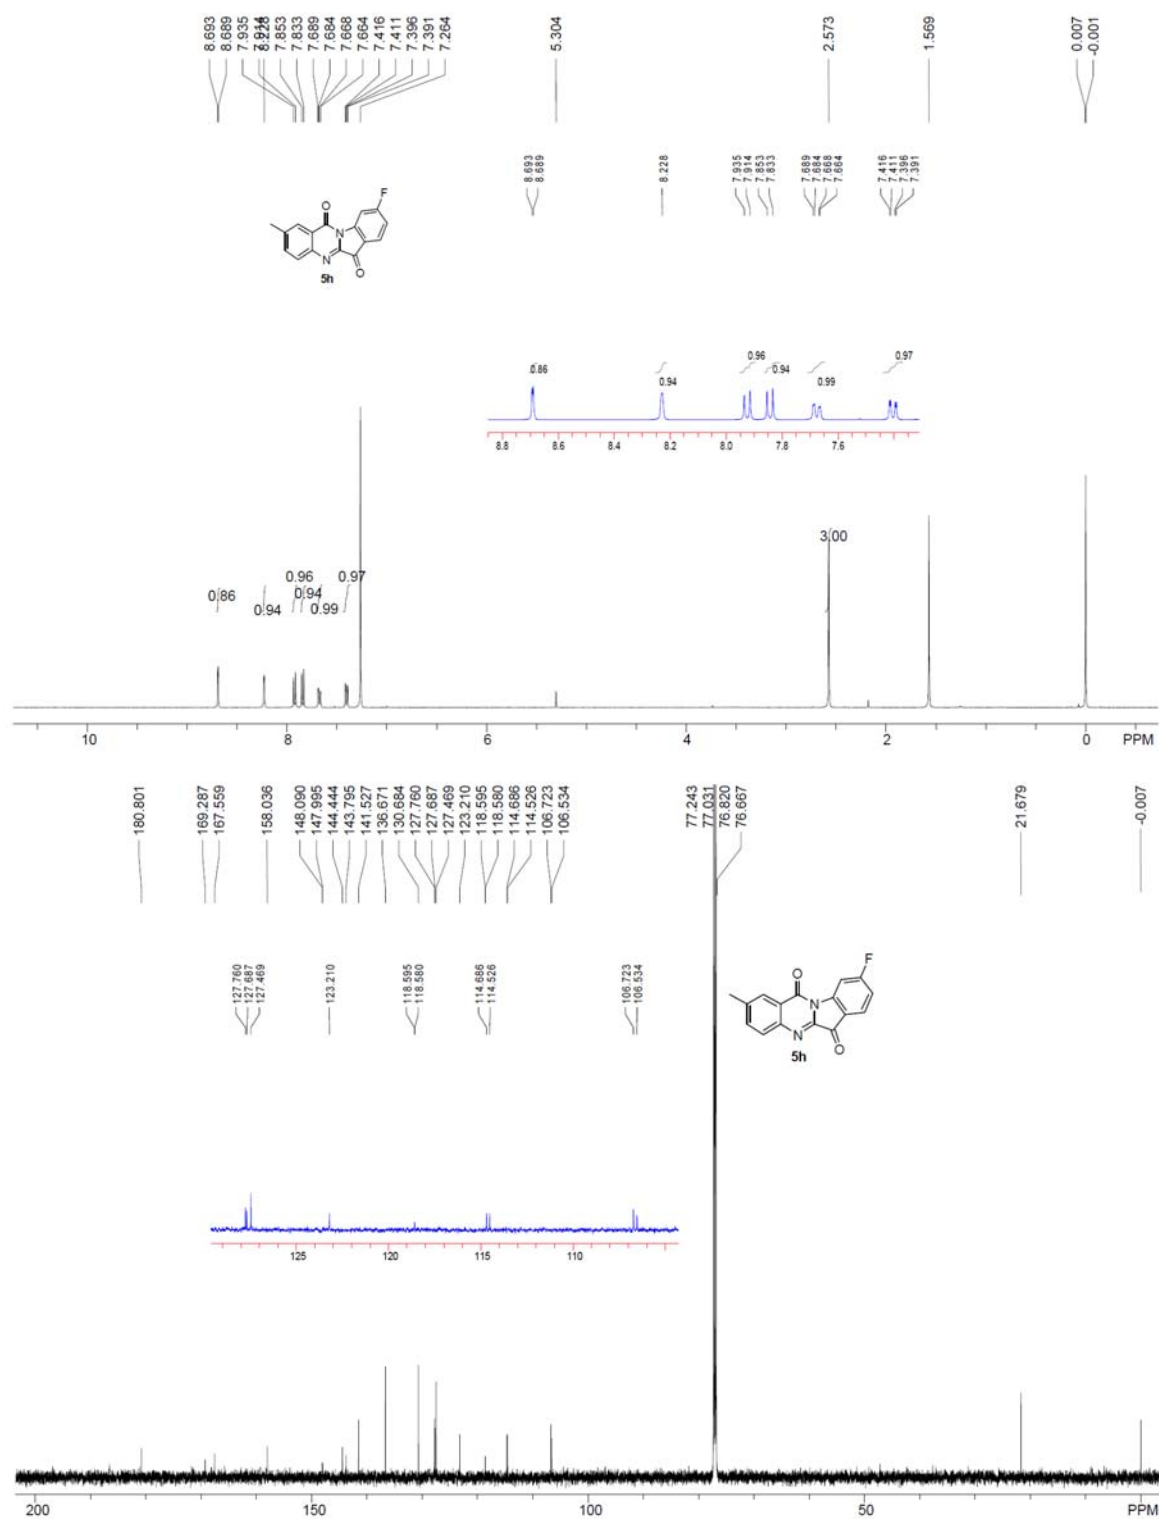

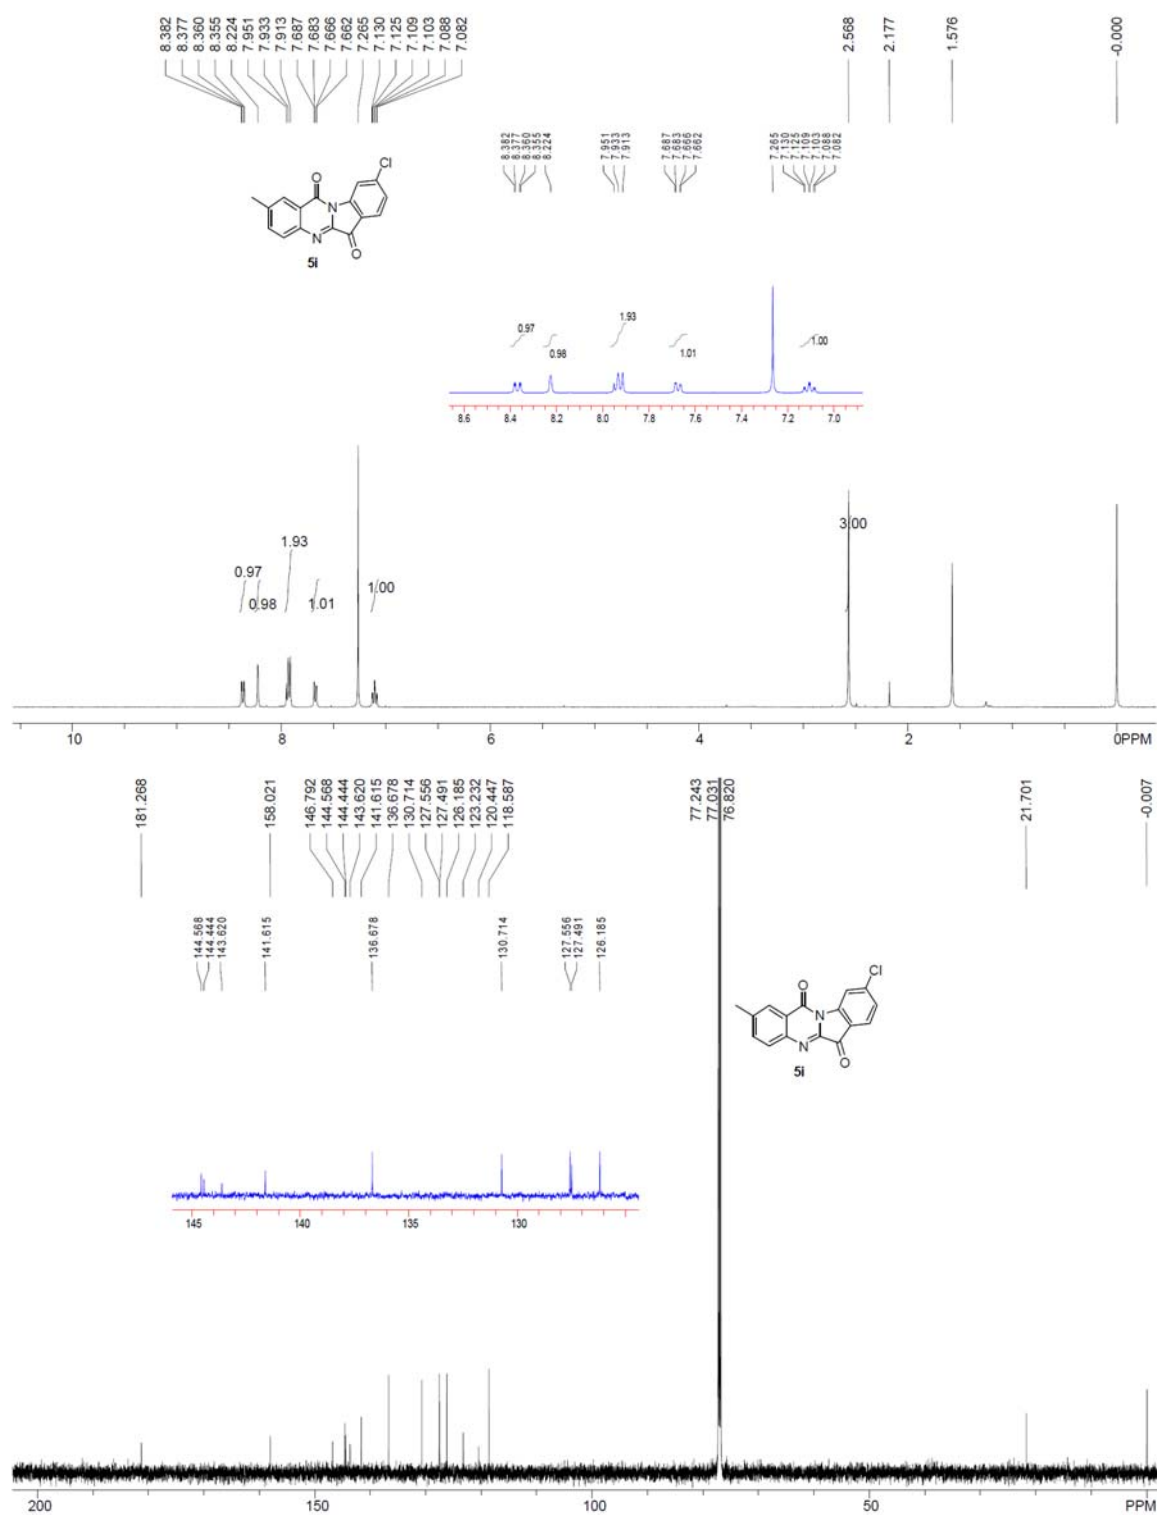



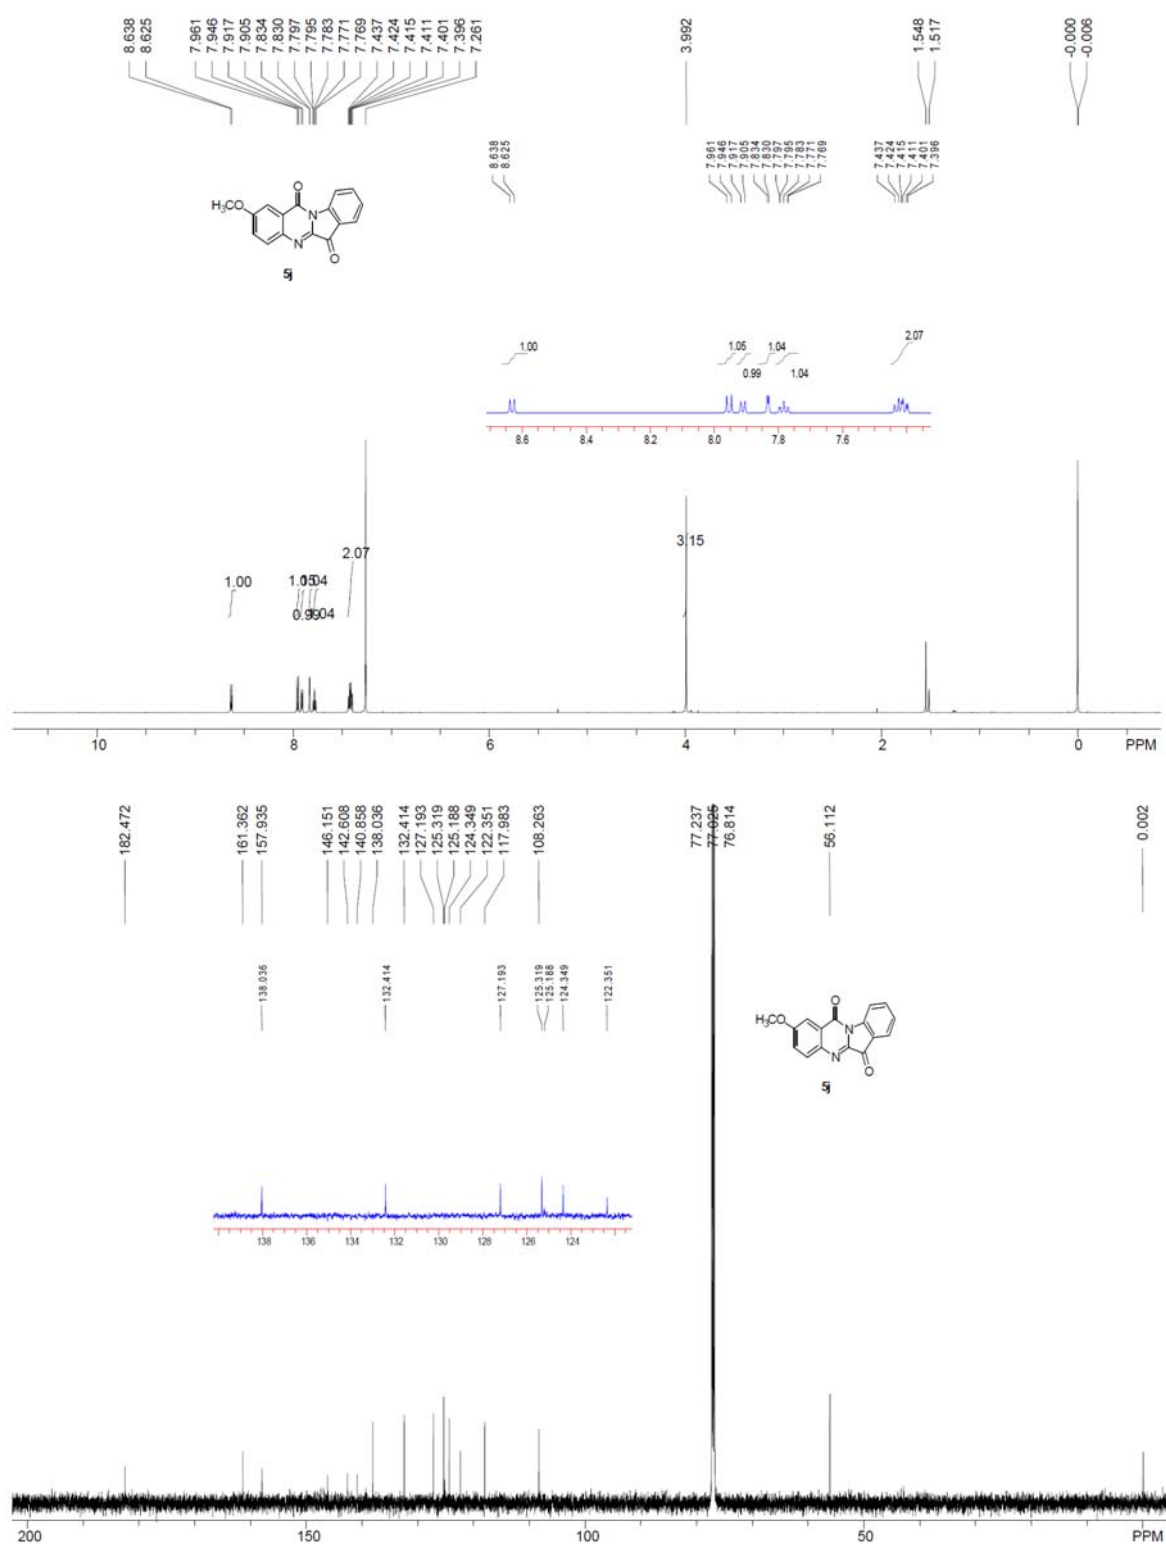

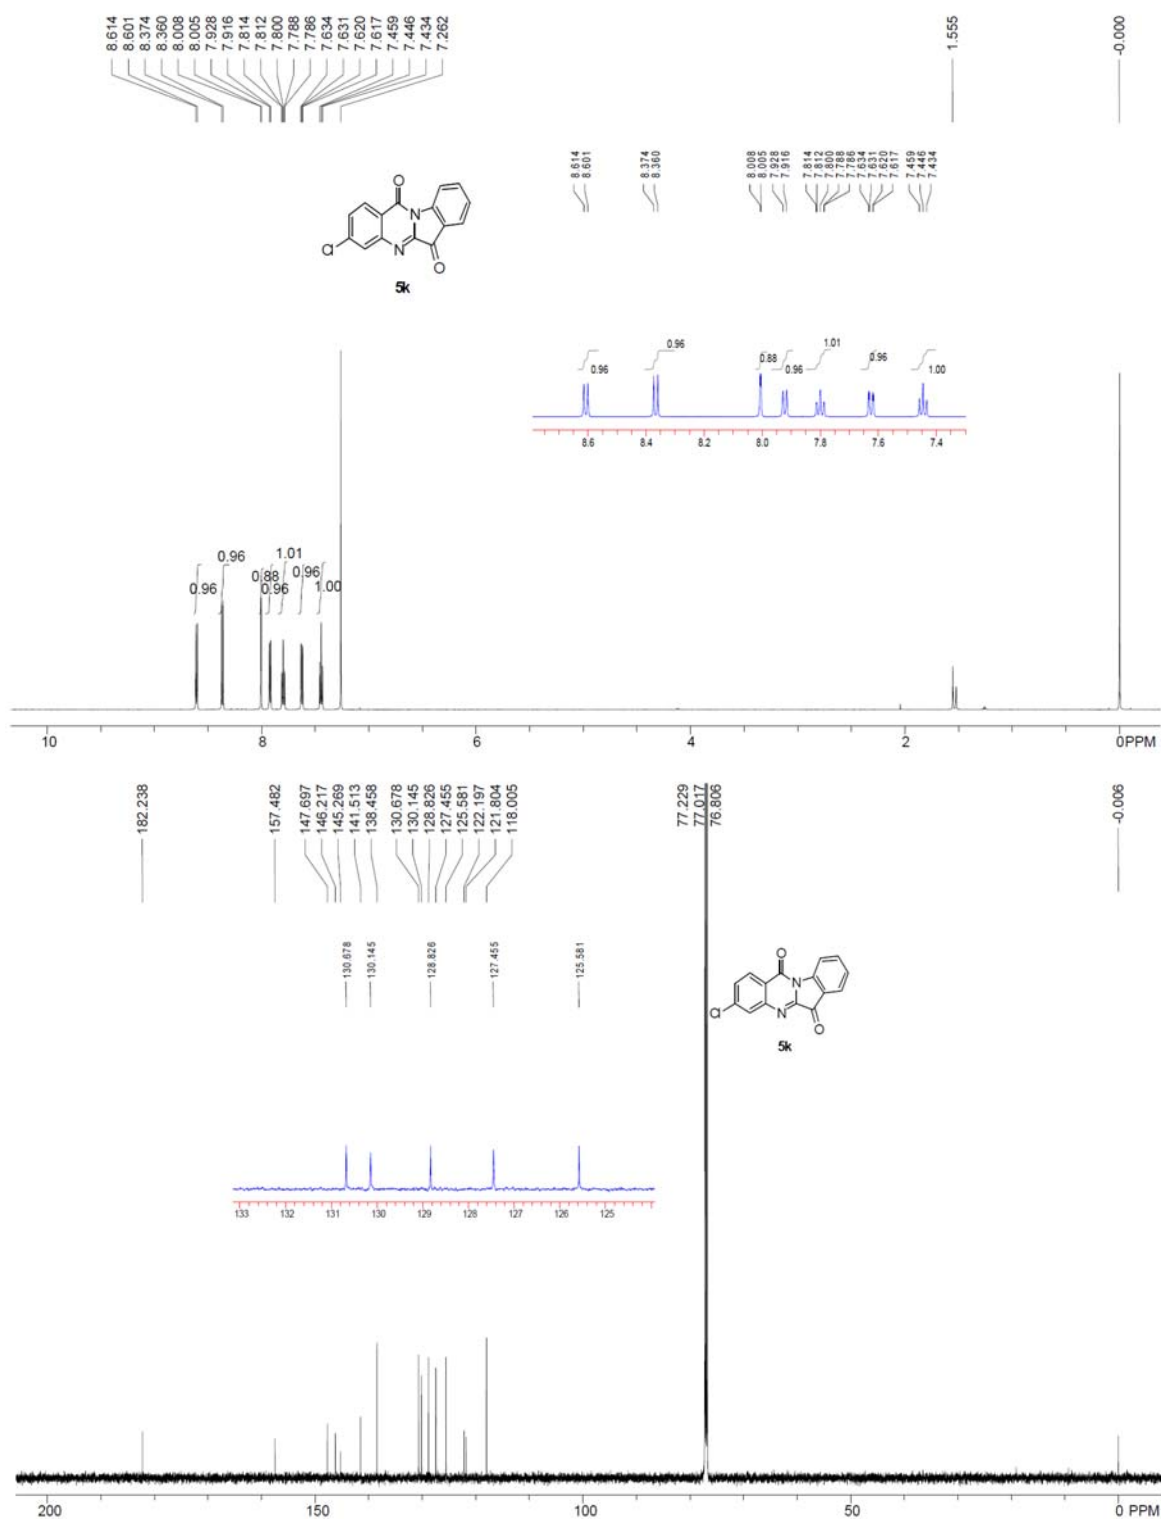

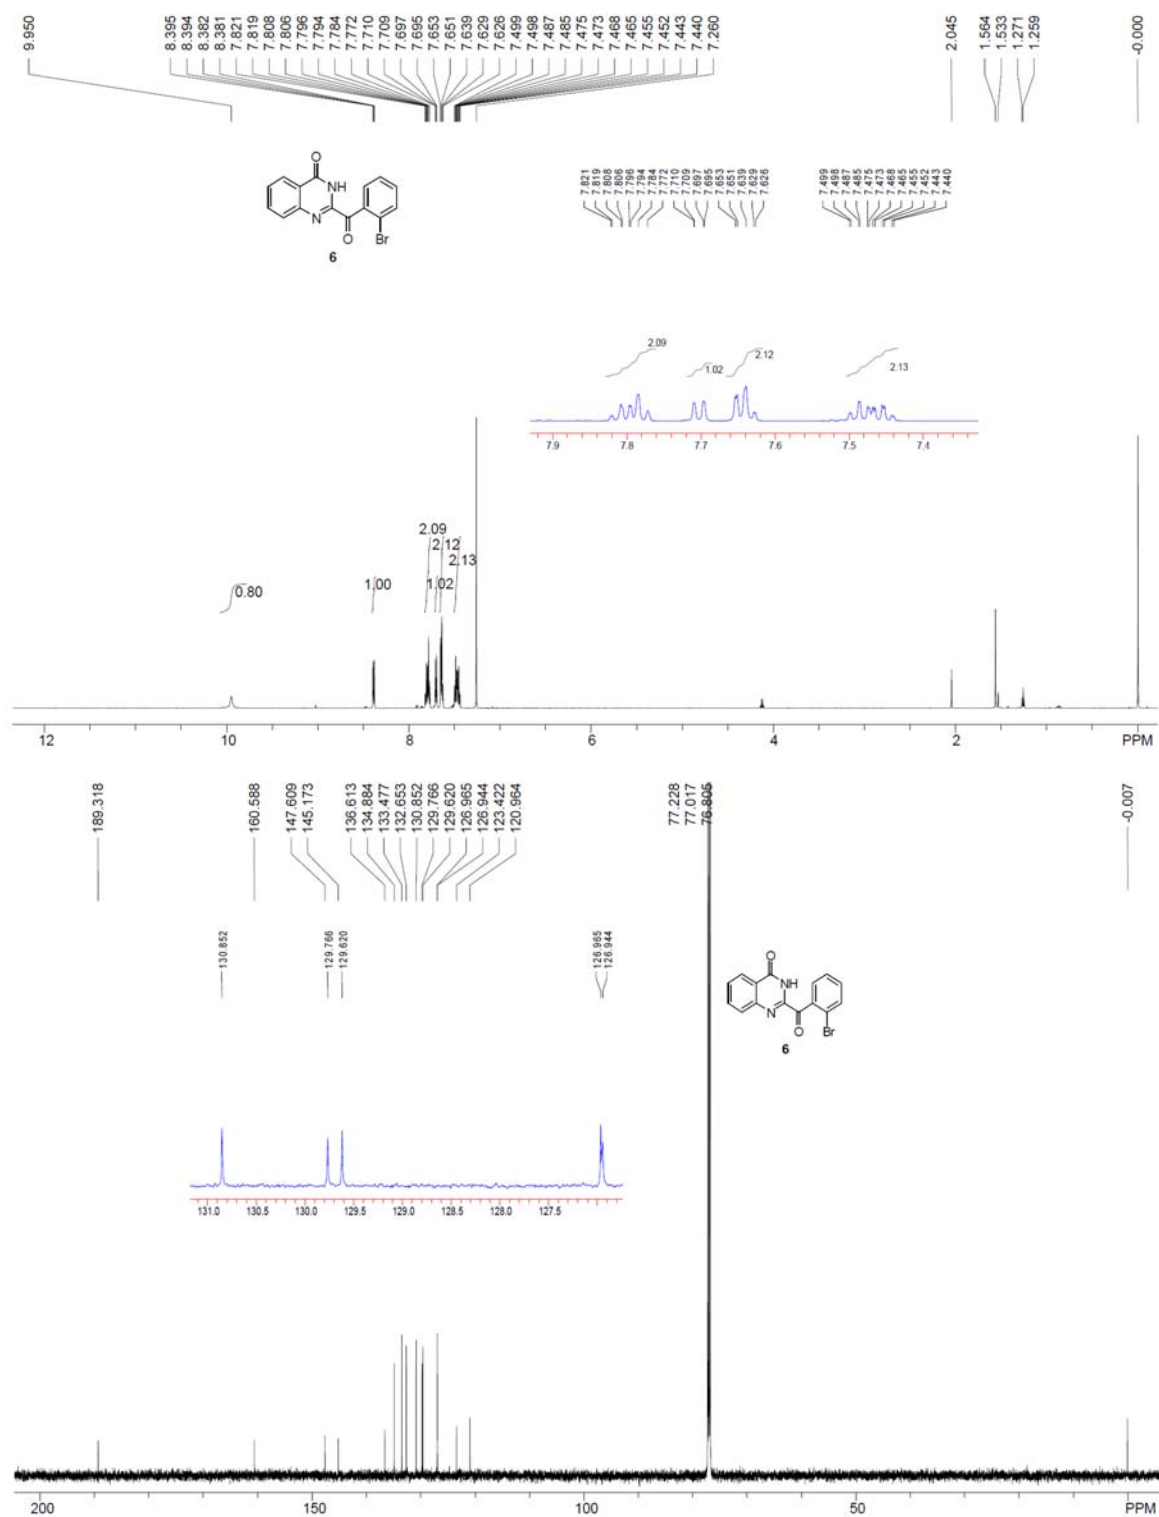

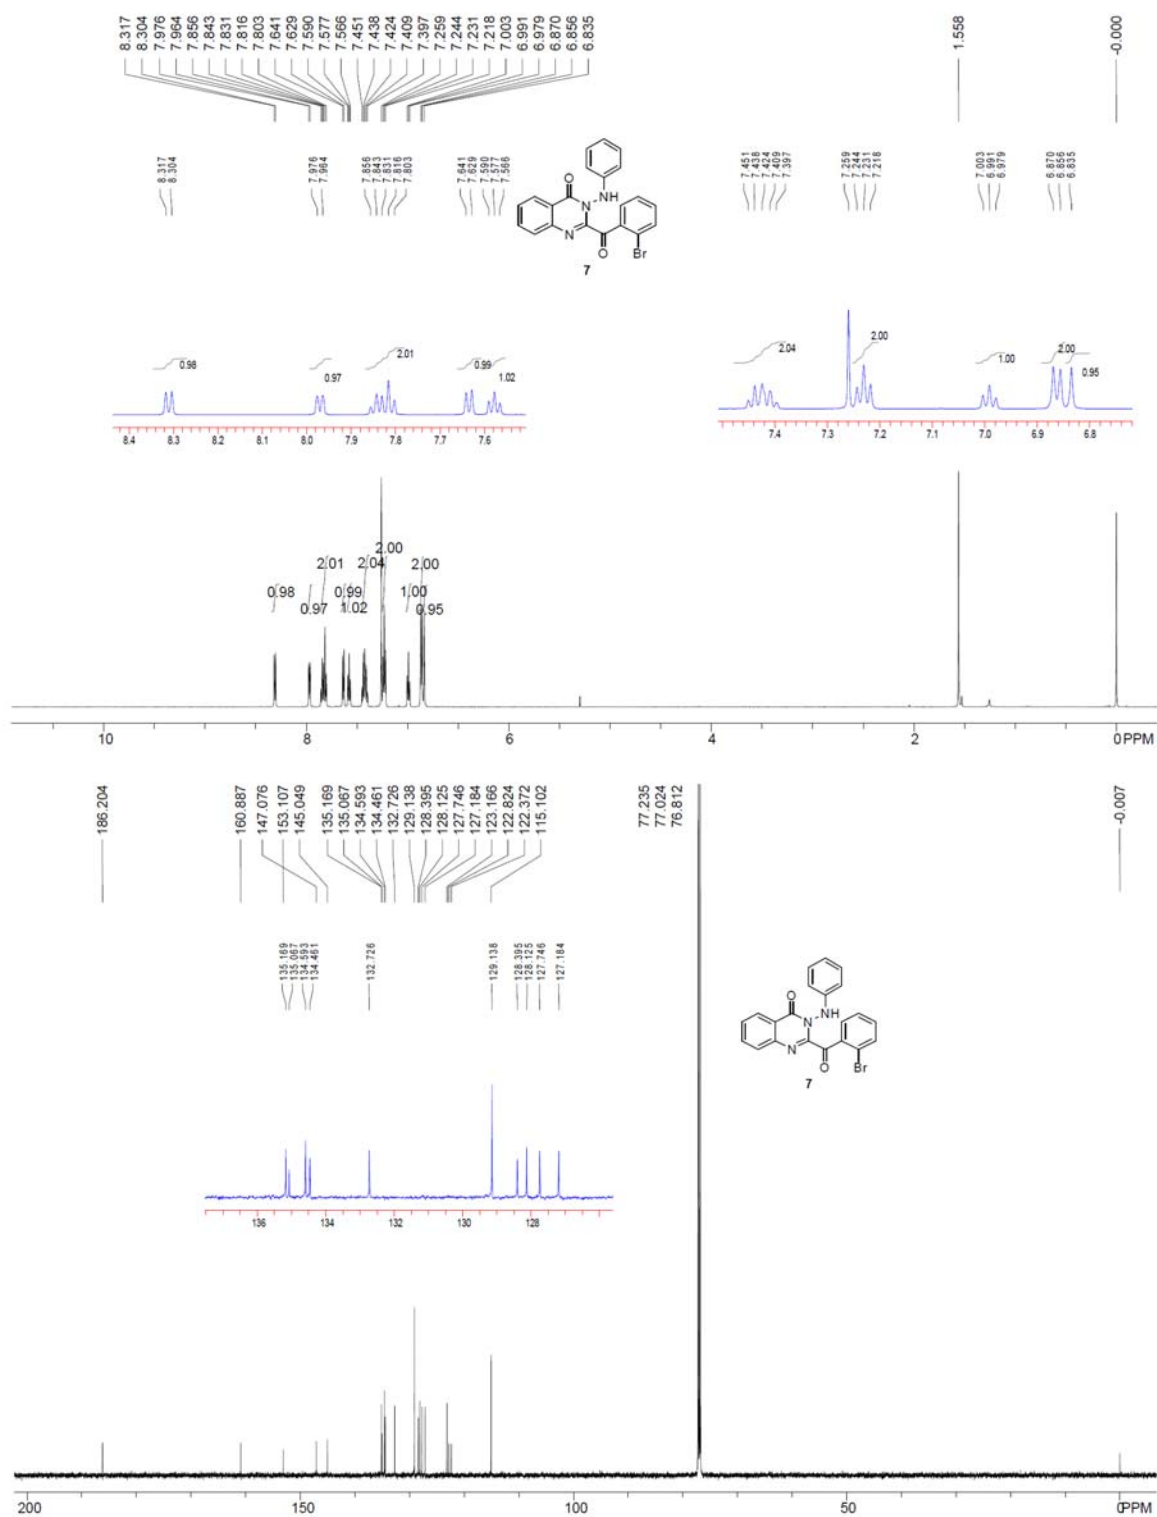

Supplement: c6ob02699k1.pdf [file c6ob02699k1.pdf]
